# Supplementary material for: Prevalence and Determinants of Antibiotic Consumption in the Elderly during 2006–2017
Source: Int J Environ Res Public Health. 2020 May 6;17(9):3243. doi: 10.3390/ijerph17093243 (PMC7246950; doi:10.3390/ijerph17093243)
Supplement: Supplementary file 1 [file ijerph-17-03243-s001.xlsx]

## Sheet: Data research
Identification	Year of the surveys	Antibiotic consumption	Gender	Age	Level of education	Body Mass Index	Marital status	Nationality	Size of town of residence	Health status	Polipharmacy	Chronic condition	Current smoking	consumption of alcoholic beverages in the two weeks prior to the survey	hospitalisation during the past twelve months	degree of limitation due to a health problem for at least six months
1	2017	0	0	1	2	1	2	0	2	2	1	1	0	1	1	2
2	2017	1	1	2	4	1	2	0	2	1	0	0	0	0	1	2
3	2017	0	1	2	3	3	3	0	2	3	1	0	0	1	0	1
4	2017	0	1	1	3	1	3	0	2	5	1	1	0	0	0	1
5	2017	0	0	0	3	2	2	0	2	2	0	1	0	1	0	3
6	2017	0	0	0	4	2	2	0	2	2	0	1	0	1	0	3
7	2017	0	0	0	1	2	3	0	2	2	0	1	0	1	0	3
8	2017	0	0	1	1	1	2	0	2	5	0	0	1	0	0	1
9	2017	0	1	0	1	2	2	0	2	2	0	0	0	0	0	3
10	2017	0	1	0	1	1	1	0	2	2	0	0	0	0	0	3
11	2017	0	1	2	1	1	3	0	2	5	1	1	0	1	0	2
12	2017	0	1	0	1	3	3	0	2	3	1	2	0	1	0	3
13	2017	0	0	1	1	1	2	0	2	4	0	1	0	1	1	1
14	2017	0	1	0	1	1	3	0	2	1	0	0	0	0	0	3
15	2017	0	1	1	3	2	2	0	2	3	0	1	0	0	0	2
16	2017	0	1	0	3	2	1	0	1	3	0	2	0	1	0	3
17	2017	0	0	0	1	1	2	0	1	5	0	1	0	1	0	1
18	2017	0	1	0	1	3	2	0	1	4	1	0	0	1	0	1
19	2017	0	0	0	1	1	2	0	1	1	0	0	1	1	0	3
20	2017	0	1	2	1	2	3	0	1	3	1	1	0	0	1	1
21	2017	0	1	0	1	2	3	0	1	4	0	1	0	0	1	3
22	2017	0	0	0	1	2	4	0	1	3	0	1	0	1	0	2
23	2017	0	1	1	1	2	2	0	1	4	1	1	0	0	0	1
24	2017	0	1	1	1	1	2	0	1	3	0	1	0	0	0	1
25	2017	0	0	0	1	2	2	0	1	4	1	1	0	1	1	1
26	2017	0	1	1	1	1	3	0	1	2	0	1	0	0	0	2
27	2017	0	0	0	1	3	2	0	1	5	0	2	0	0	0	1
28	2017	0	0	0	3	2	2	0	1	3	0	2	0	1	0	3
29	2017	0	1	2	1	1	2	0	1	3	0	1	0	0	0	1
30	2017	0	0	1	1	1	2	0	1	4	1	1	0	0	0	1
31	2017	0	1	0	3	3	2	0	1	4	1	1	0	0	1	1
32	2017	0	1	1	1	1	3	0	1	4	0	1	0	0	0	2
33	2017	0	0	0	2	3	4	0	1	4	0	1	0	0	0	1
34	2017	0	1	1	1	1	2	0	1	5	0	1	0	0	1	1
35	2017	0	1	0	2	2	3	0	1	2	0	0	0	1	0	3
36	2017	1	0	1	1	2	3	0	1	4	0	1	0	1	0	1
37	2017	0	1	0	1	1	2	0	1	3	1	2	0	0	0	3
38	2017	0	1	0	2	2	3	0	0	4	0	2	0	1	0	2
39	2017	0	0	1	1	2	2	0	0	3	0	1	0	1	0	3
40	2017	1	1	1	1	3	3	0	0	3	0	0	0	0	0	2
41	2017	0	1	1	1	2	2	0	0	5	1	1	0	0	1	1
42	2017	1	1	0	3	1	4	1	0	4	1	1	0	0	0	1
43	2017	0	0	0	2	3	1	0	0	2	0	2	0	1	0	3
44	2017	0	1	0	3	2	2	0	0	3	0	1	0	0	0	2
45	2017	1	0	1	2	2	2	0	0	3	1	1	0	1	1	2
46	2017	0	1	0	3	3	3	0	0	3	0	1	0	1	0	2
47	2017	0	1	2	1	1	1	0	0	5	1	1	0	0	1	1
48	2017	0	1	0	1	2	4	0	0	4	1	1	0	1	0	2
49	2017	0	0	1	1	2	1	0	0	4	0	0	0	1	0	2
50	2017	0	0	1	3	1	2	1	0	2	0	1	0	1	0	3
51	2017	0	1	1	1	2	2	0	0	5	0	1	0	0	0	1
52	2017	0	1	0	1	2	2	0	0	1	0	0	0	0	0	2
53	2017	0	1	0	1	2	3	0	0	2	0	1	0	1	0	3
54	2017	1	1	1	1	2	2	0	0	3	0	1	0	1	0	1
55	2017	0	0	1	3	2	1	0	0	2	0	1	0	1	0	2
56	2017	0	1	1	1	2	3	0	2	4	0	1	0	0	0	1
57	2017	1	1	1	1	1	2	0	2	5	1	2	0	0	1	2
58	2017	1	1	0	4	1	2	0	2	3	0	1	0	1	0	3
59	2017	0	1	1	1	1	3	0	2	3	1	1	0	0	0	3
60	2017	0	1	0	2	2	3	0	2	3	0	1	0	0	0	3
61	2017	0	0	0	2	2	2	0	2	2	0	1	0	1	0	3
62	2017	0	1	0	3	3	3	0	2	3	0	1	0	0	0	3
63	2017	0	1	0	2	3	3	0	2	5	1	1	0	1	0	2
64	2017	0	0	0	2	3	2	0	2	3	0	2	0	1	0	3
65	2017	0	0	0	2	2	2	0	2	2	0	1	0	1	0	3
66	2017	0	1	0	1	2	3	0	2	3	0	1	0	1	0	2
67	2017	0	1	1	1	3	2	0	2	3	1	1	0	0	0	2
68	2017	0	0	1	1	3	1	0	2	5	1	1	0	1	1	2
69	2017	0	0	0	1	2	2	0	2	1	0	2	0	0	0	3
70	2017	0	1	0	3	1	2	0	2	3	1	1	1	1	0	2
71	2017	0	1	0	1	3	2	0	2	3	1	2	0	0	0	2
72	2017	0	0	0	3	2	2	0	2	2	0	1	0	1	0	3
73	2017	0	0	0	3	1	2	0	2	2	1	1	0	1	0	3
74	2017	1	1	1	2	1	3	0	2	3	1	2	0	1	1	2
75	2017	0	1	2	1	3	3	0	2	4	1	1	0	0	0	2
76	2017	1	1	1	1	2	3	0	2	5	1	1	0	0	1	2
77	2017	0	1	1	1	2	3	0	2	3	1	2	0	0	0	2
78	2017	0	1	1	3	2	3	1	2	2	0	1	0	1	0	2
79	2017	1	1	1	1	3	3	0	2	2	0	0	0	0	0	2
80	2017	0	1	0	2	1	2	0	2	3	0	2	0	1	0	3
81	2017	0	1	2	1	3	3	0	2	2	1	2	0	0	0	1
82	2017	0	1	1	2	1	3	0	2	1	0	0	0	1	0	3
83	2017	0	1	0	3	1	1	0	2	3	0	1	1	0	0	3
84	2017	0	1	1	1	3	3	0	2	4	1	1	0	1	0	2
85	2017	0	1	1	4	1	3	0	2	2	0	2	0	1	0	3
86	2017	0	1	1	2	2	2	0	2	2	0	1	0	1	0	2
87	2017	1	0	0	3	3	2	0	2	3	0	1	0	1	0	3
88	2017	0	1	0	4	2	3	0	2	3	0	1	1	1	0	3
89	2017	0	1	1	1	3	2	0	1	4	0	2	0	0	0	1
90	2017	0	0	1	1	2	2	0	1	3	1	2	0	1	0	3
91	2017	0	0	0	2	2	2	0	1	2	0	0	0	1	0	3
92	2017	0	0	0	4	2	2	0	1	1	0	0	1	1	0	3
93	2017	0	1	0	1	2	1	0	1	3	0	0	0	0	0	2
94	2017	1	1	0	1	2	2	0	1	4	1	2	0	0	0	2
95	2017	0	1	0	2	1	2	0	1	3	0	2	0	1	0	2
96	2017	1	0	0	2	2	2	0	1	2	0	2	0	0	1	2
97	2017	0	0	0	1	2	2	0	1	3	0	0	0	1	0	2
98	2017	0	1	0	3	3	1	0	1	2	0	1	0	1	0	3
99	2017	0	1	0	2	2	2	0	1	4	0	0	0	1	0	3
100	2017	0	1	2	1	2	3	0	1	4	0	2	0	0	0	1
101	2017	0	1	2	2	2	3	0	1	1	0	1	0	0	0	2
102	2017	0	1	1	2	1	2	0	1	3	0	1	0	1	0	3
103	2017	0	0	0	3	3	2	0	1	3	0	0	0	1	0	2
104	2017	0	0	2	1	2	1	0	1	3	0	1	0	0	0	3
105	2017	0	0	0	2	2	2	0	1	2	0	1	0	1	0	3
106	2017	0	0	0	2	1	1	0	1	2	0	0	0	0	0	3
107	2017	0	0	0	4	2	3	0	1	1	0	1	0	1	0	3
108	2017	0	1	0	1	3	3	0	1	2	0	1	0	1	0	3
109	2017	0	1	0	1	1	3	0	1	2	0	0	1	0	0	3
110	2017	0	1	0	2	1	3	0	1	3	0	1	0	1	0	2
111	2017	0	1	1	2	3	3	0	1	4	1	2	0	0	0	2
112	2017	0	1	0	2	1	3	0	1	2	0	1	0	1	0	3
113	2017	0	0	1	4	2	3	0	1	3	1	2	0	1	1	2
114	2017	1	0	1	2	2	2	0	1	2	0	0	0	1	0	3
115	2017	0	0	0	2	1	2	0	1	3	1	1	0	1	0	2
116	2017	0	1	0	1	2	2	0	1	5	1	2	0	0	0	2
117	2017	0	1	1	2	1	1	0	1	2	0	1	0	0	0	3
118	2017	0	1	1	2	2	3	0	1	3	1	0	0	1	0	2
119	2017	0	0	0	3	2	2	0	1	2	0	1	0	1	0	3
120	2017	0	1	1	2	1	1	0	1	4	0	1	0	0	1	2
121	2017	0	1	0	1	2	2	0	1	3	0	0	0	1	0	2
122	2017	0	1	2	1	3	3	0	1	5	1	1	0	0	0	1
123	2017	0	0	0	1	3	2	0	1	3	0	0	0	1	0	2
124	2017	0	0	0	3	3	2	0	1	2	0	1	0	1	0	3
125	2017	0	0	0	2	2	4	0	1	2	0	2	0	1	0	3
126	2017	0	1	1	1	2	1	0	1	4	1	1	0	0	1	2
127	2017	0	1	2	1	2	3	0	1	3	1	1	0	0	0	2
128	2017	0	1	2	2	2	3	0	1	4	1	1	0	0	0	2
129	2017	0	1	1	1	1	2	0	1	2	1	2	0	0	0	3
130	2017	0	1	0	1	3	3	0	1	2	0	2	0	0	0	3
131	2017	0	0	1	2	3	3	0	1	3	1	1	0	1	1	3
132	2017	0	1	1	1	3	3	0	1	3	0	1	0	1	0	2
133	2017	0	0	0	2	3	2	0	1	3	0	1	0	1	0	3
134	2017	0	0	0	1	1	2	0	1	2	0	0	0	1	0	3
135	2017	0	1	0	2	2	3	0	1	4	1	2	0	1	1	2
136	2017	0	1	1	1	3	3	0	1	3	1	2	0	0	0	2
137	2017	0	0	1	3	2	3	0	1	5	1	2	0	1	0	2
138	2017	0	0	0	3	3	1	0	1	2	1	2	0	1	0	3
139	2017	0	0	1	4	1	2	0	1	2	0	0	0	1	0	3
140	2017	0	1	0	1	3	2	0	1	2	0	1	0	1	0	2
141	2017	0	1	0	3	3	2	0	1	5	0	1	0	0	1	1
142	2017	0	1	0	2	1	2	0	1	1	0	1	0	1	0	2
143	2017	1	1	0	1	1	2	0	1	5	1	1	0	0	1	3
144	2017	0	1	0	1	1	3	0	1	5	1	1	0	0	0	2
145	2017	0	1	0	1	2	3	0	1	5	1	2	0	0	0	1
146	2017	0	0	0	3	1	2	0	1	1	0	0	1	1	0	3
147	2017	0	0	1	1	2	2	0	1	2	0	0	0	1	0	3
148	2017	0	1	2	1	3	2	0	1	4	1	1	0	0	0	2
149	2017	0	0	1	1	2	2	0	1	4	0	1	0	0	0	2
150	2017	0	0	0	1	2	2	0	1	2	0	1	0	1	0	3
151	2017	0	1	0	1	3	2	0	1	3	0	2	0	0	0	2
152	2017	1	1	1	1	2	3	0	0	4	1	1	0	0	1	2
153	2017	1	1	2	1	2	3	0	0	3	0	1	0	0	0	2
154	2017	0	0	1	1	2	2	0	0	3	0	0	0	0	0	1
155	2017	0	1	1	1	2	3	0	0	1	0	1	0	1	0	3
156	2017	0	1	0	2	3	3	0	0	3	1	2	0	1	0	2
157	2017	0	1	2	1	2	3	0	0	4	1	2	0	1	0	2
158	2017	0	0	1	1	2	2	0	0	3	0	1	0	0	1	3
159	2017	0	0	1	1	2	3	0	0	2	0	0	0	0	0	3
160	2017	0	1	1	1	2	3	0	0	3	1	1	0	0	0	1
161	2017	1	1	0	1	3	2	0	0	3	1	2	0	0	0	2
162	2017	0	1	0	1	2	2	0	0	2	0	1	0	1	0	3
163	2017	0	1	1	4	2	2	0	2	3	0	1	0	0	0	3
164	2017	0	1	1	1	2	3	0	2	4	1	1	0	0	0	2
165	2017	0	0	0	3	2	2	0	2	5	0	1	0	1	0	2
166	2017	0	1	1	1	1	2	0	2	2	1	2	0	0	0	3
167	2017	0	1	0	1	1	2	0	2	3	0	1	0	0	0	3
168	2017	0	0	0	2	2	2	0	2	2	0	1	0	1	0	3
169	2017	0	1	2	3	3	1	0	2	4	1	2	0	0	0	1
170	2017	0	0	0	3	2	1	0	2	2	0	0	0	0	0	2
171	2017	0	1	0	4	1	3	0	2	5	0	2	0	1	1	2
172	2017	0	1	2	2	2	3	0	2	2	0	0	0	0	0	2
173	2017	0	1	1	4	3	3	0	2	3	1	1	0	1	0	3
174	2017	1	1	0	3	1	3	0	2	3	1	0	0	1	0	1
175	2017	0	1	0	1	2	3	0	2	4	0	1	0	0	0	2
176	2017	0	1	1	1	2	3	0	2	3	0	2	0	0	0	2
177	2017	0	0	1	2	3	4	0	2	5	0	1	1	1	0	2
178	2017	0	0	0	2	1	2	0	2	3	0	1	0	1	0	2
179	2017	0	1	2	1	2	3	0	2	3	1	2	0	1	0	2
180	2017	0	0	0	3	3	2	0	2	2	0	0	0	1	1	3
181	2017	0	1	2	1	3	3	0	2	3	1	2	0	0	0	2
182	2017	0	0	1	3	1	2	0	2	2	0	1	0	1	0	3
183	2017	0	1	0	2	3	2	0	2	3	1	1	0	0	0	2
184	2017	0	0	0	2	1	2	0	2	2	0	0	0	1	0	2
185	2017	0	0	1	2	2	2	0	2	2	0	1	0	1	0	2
186	2017	0	0	0	3	2	2	0	2	3	0	1	0	1	0	3
187	2017	0	0	1	3	2	2	0	2	3	1	2	0	1	0	3
188	2017	0	0	2	1	2	2	0	2	3	0	1	0	1	0	2
189	2017	0	1	0	2	3	3	0	2	2	0	2	0	1	1	3
190	2017	1	0	1	4	1	2	0	2	2	1	1	0	0	0	3
191	2017	0	1	0	3	2	2	0	2	3	0	1	0	0	0	2
192	2017	0	1	0	3	2	1	0	2	3	0	1	0	0	0	3
193	2017	0	1	0	2	2	2	0	2	2	1	1	0	1	0	3
194	2017	0	0	0	4	2	2	0	2	2	0	2	0	1	0	3
195	2017	0	1	0	1	1	2	0	2	2	0	1	0	1	0	3
196	2017	0	0	1	2	2	2	0	2	3	0	1	0	1	0	3
197	2017	0	0	1	1	2	2	0	1	3	0	1	0	1	0	3
198	2017	0	1	2	1	1	3	0	1	2	1	1	0	0	0	2
199	2017	0	1	1	1	2	3	0	1	2	1	1	0	1	0	3
200	2017	0	0	0	3	1	2	0	1	3	0	1	1	1	0	3
201	2017	0	0	0	3	2	2	0	1	3	0	1	0	1	0	3
202	2017	0	0	0	1	3	2	0	1	2	0	2	0	1	0	3
203	2017	0	1	1	1	2	2	0	1	3	0	1	0	0	0	2
204	2017	0	1	0	1	3	3	0	1	3	0	1	0	0	0	3
205	2017	0	1	1	1	3	3	0	1	4	1	2	0	0	0	2
206	2017	0	0	2	1	2	2	0	1	3	1	1	0	0	0	3
207	2017	0	0	1	1	3	2	0	1	3	0	1	0	1	0	2
208	2017	0	1	1	2	3	2	0	1	5	1	2	0	1	0	1
209	2017	0	1	1	3	3	2	0	1	2	0	1	1	1	0	3
210	2017	0	0	0	3	2	2	0	1	2	0	0	0	1	0	3
211	2017	0	0	2	1	3	3	0	1	3	1	1	1	0	0	2
212	2017	0	0	1	1	3	2	0	1	3	1	1	0	0	0	2
213	2017	0	1	0	1	3	2	0	1	3	0	1	0	0	0	2
214	2017	0	1	1	2	2	2	0	1	4	0	1	0	0	0	2
215	2017	1	0	2	1	1	2	0	1	4	1	0	0	0	1	1
216	2017	0	1	2	1	1	3	0	1	3	1	1	0	0	0	1
217	2017	0	1	1	1	2	3	0	1	3	1	2	0	0	1	1
218	2017	0	0	1	1	1	2	0	1	3	1	1	0	0	0	2
219	2017	0	1	2	2	2	3	0	1	2	0	1	0	0	0	1
220	2017	0	1	2	2	2	1	0	1	2	0	1	0	0	0	3
221	2017	0	0	1	1	1	2	0	1	2	0	0	0	0	0	3
222	2017	0	1	0	2	1	3	0	1	3	0	0	0	1	0	3
223	2017	0	1	2	1	2	3	0	0	2	0	1	0	0	0	3
224	2017	0	1	2	1	1	2	0	0	5	1	2	0	0	0	1
225	2017	0	1	0	1	3	4	0	0	4	1	1	0	0	0	2
226	2017	0	1	2	1	3	2	0	0	3	0	2	0	0	1	2
227	2017	0	0	1	2	2	3	0	0	3	1	1	0	0	0	2
228	2017	0	1	2	1	0	3	0	0	5	0	0	0	0	0	1
229	2017	0	1	2	1	2	3	0	0	2	1	1	0	0	0	2
230	2017	0	0	0	1	3	2	0	0	2	0	1	0	0	0	3
231	2017	0	0	2	1	3	2	0	0	3	1	1	0	1	0	3
232	2017	0	0	2	1	2	2	0	0	2	0	1	0	1	0	3
233	2017	0	1	1	3	2	2	0	0	2	0	2	0	0	0	2
234	2017	0	1	2	1	1	3	0	0	2	0	1	0	0	0	2
235	2017	0	1	1	1	2	3	0	0	4	0	1	0	0	0	2
236	2017	0	0	1	2	1	2	0	0	2	0	1	0	1	0	3
237	2017	0	1	0	3	1	1	0	0	2	0	0	0	0	0	3
238	2017	0	1	2	1	3	3	0	0	4	1	1	0	0	0	1
239	2017	0	0	2	1	2	2	0	0	3	0	1	0	1	0	2
240	2017	0	0	1	2	1	1	0	0	3	0	1	0	0	0	1
241	2017	0	0	0	1	3	2	0	0	4	0	2	1	0	0	2
242	2017	0	1	0	4	1	3	0	0	3	0	0	1	1	1	2
243	2017	0	1	2	1	3	3	0	0	4	0	1	0	1	0	1
244	2017	0	0	0	2	2	2	0	0	3	0	2	0	1	0	2
245	2017	0	1	2	1	1	3	0	0	5	0	1	0	0	0	1
246	2017	0	1	1	1	1	3	0	0	3	1	2	0	0	0	1
247	2017	0	0	0	2	2	3	0	0	2	0	1	0	0	0	3
248	2017	0	1	1	1	2	3	0	0	3	0	1	0	1	0	2
249	2017	0	1	1	3	2	1	0	2	4	1	1	0	0	0	2
250	2017	0	0	1	2	3	2	0	2	4	0	1	0	1	0	2
251	2017	0	1	2	1	1	1	0	2	3	1	2	0	0	0	2
252	2017	0	1	2	3	3	1	0	2	2	0	1	0	0	0	1
253	2017	0	1	1	2	1	4	0	2	4	0	1	0	0	0	3
254	2017	0	0	0	3	1	2	0	2	3	0	2	0	1	0	3
255	2017	0	1	0	4	2	3	0	2	3	0	0	0	0	0	3
256	2017	0	1	2	1	2	3	0	2	2	0	0	0	0	0	3
257	2017	0	0	0	4	2	2	0	2	1	0	0	0	1	0	3
258	2017	0	0	0	2	1	2	0	2	1	0	0	0	1	0	3
259	2017	0	1	0	4	2	2	0	2	3	0	1	0	1	0	3
260	2017	0	0	0	3	2	2	0	2	2	0	0	0	1	0	3
261	2017	1	1	2	1	1	3	0	2	5	1	2	0	0	0	1
262	2017	0	0	0	1	1	2	0	2	2	0	0	1	0	0	3
263	2017	0	1	0	2	2	3	0	2	4	1	2	0	0	0	1
264	2017	0	1	0	2	3	2	0	2	3	0	0	0	0	0	3
265	2017	0	0	0	3	2	4	0	2	4	0	1	0	1	0	3
266	2017	0	1	1	2	2	4	0	2	1	0	1	0	0	0	3
267	2017	0	0	0	4	2	1	0	2	3	1	2	1	0	0	3
268	2017	0	0	0	2	3	2	0	2	5	1	2	0	0	1	1
269	2017	0	0	0	4	3	2	0	2	1	0	0	0	1	0	3
270	2017	0	1	0	3	3	3	0	2	3	1	1	0	1	0	3
271	2017	0	0	0	3	2	2	0	2	2	0	1	0	1	0	3
272	2017	0	1	0	3	1	4	0	2	2	0	1	0	1	0	3
273	2017	0	1	2	4	1	3	0	2	3	0	1	0	0	1	2
274	2017	0	1	0	3	2	4	0	2	2	0	1	1	1	0	3
275	2017	0	1	0	3	2	2	0	2	2	0	2	0	0	0	3
276	2017	0	1	2	1	3	2	0	2	5	1	0	0	0	0	1
277	2017	0	1	0	3	0	2	0	2	4	1	2	1	1	0	2
278	2017	0	1	1	1	3	2	0	2	3	1	1	0	0	0	2
279	2017	0	1	1	2	2	3	0	2	3	1	2	0	0	0	3
280	2017	0	1	0	1	3	2	0	2	2	0	1	0	1	0	3
281	2017	0	0	0	4	1	2	0	2	5	0	1	0	0	0	1
282	2017	0	1	1	3	2	2	0	2	2	0	0	0	1	0	3
283	2017	0	0	0	3	2	2	0	2	2	0	1	0	1	0	3
284	2017	0	0	1	2	1	2	0	2	3	0	0	0	1	0	3
285	2017	0	1	1	1	2	3	0	1	2	0	1	0	0	0	3
286	2017	0	0	1	1	3	2	0	1	5	1	2	0	1	0	1
287	2017	0	0	0	1	3	2	0	1	3	0	2	0	1	0	3
288	2017	0	1	0	1	2	3	0	1	1	0	0	0	1	0	3
289	2017	0	1	0	1	3	3	0	1	3	1	2	0	0	1	2
290	2017	1	1	1	1	1	3	0	1	2	1	2	0	1	0	3
291	2017	0	0	1	1	2	2	0	1	4	1	2	0	1	0	3
292	2017	0	1	0	1	2	3	0	1	3	1	1	0	0	0	2
293	2017	0	1	1	1	3	3	0	1	5	1	2	0	1	0	1
294	2017	0	1	1	1	2	3	0	1	3	1	2	0	0	0	3
295	2017	0	0	0	2	2	2	0	1	2	0	1	1	1	0	3
296	2017	0	1	0	2	2	2	0	1	5	1	2	0	0	0	2
297	2017	0	1	0	1	2	2	0	1	3	0	1	0	0	0	3
298	2017	0	1	1	1	2	3	0	1	4	1	2	0	0	0	2
299	2017	0	0	1	1	3	2	0	1	3	0	1	0	1	1	3
300	2017	0	1	1	1	3	2	0	1	4	1	2	0	0	1	1
301	2017	0	1	1	1	2	3	0	1	3	1	2	0	0	0	2
302	2017	0	1	0	1	2	3	0	1	3	0	1	0	1	0	2
303	2017	0	1	1	2	2	2	0	1	3	0	1	0	0	0	2
304	2017	0	1	1	1	3	3	0	1	2	0	1	0	0	0	3
305	2017	0	0	1	1	3	2	0	1	2	0	1	0	1	0	3
306	2017	0	0	1	2	2	2	0	1	2	1	2	1	1	0	2
307	2017	0	1	0	2	1	2	0	1	2	0	0	0	0	0	3
308	2017	0	1	1	1	2	3	0	1	2	0	0	0	1	0	3
309	2017	0	1	1	1	3	3	0	1	3	1	1	0	0	1	3
310	2017	0	0	2	1	2	3	0	1	5	1	1	0	1	0	1
311	2017	0	0	0	2	3	2	0	1	3	0	1	0	1	0	2
312	2017	0	0	0	4	2	4	0	1	2	0	0	0	1	0	3
313	2017	0	1	0	1	3	3	0	1	3	1	1	0	0	0	2
314	2017	0	1	2	1	1	3	0	1	4	0	1	0	0	0	2
315	2017	0	1	0	3	2	2	0	0	2	0	1	0	0	0	3
316	2017	1	0	0	1	1	2	0	0	4	0	2	0	0	0	2
317	2017	0	1	0	2	3	4	0	0	3	0	1	0	0	0	3
318	2017	0	0	0	3	2	2	0	0	1	0	1	0	1	0	3
319	2017	0	0	0	1	2	2	0	0	2	0	0	0	0	0	3
320	2017	0	1	1	1	3	2	0	0	4	1	1	0	0	0	2
321	2017	1	1	2	1	3	3	0	0	3	1	1	0	0	0	2
322	2017	0	0	0	3	2	2	1	0	3	0	0	0	1	0	3
323	2017	0	1	0	3	1	2	1	0	2	0	0	0	1	0	3
324	2017	0	1	1	1	3	3	0	0	5	1	1	0	1	0	2
325	2017	0	1	1	1	2	3	0	0	2	0	1	0	0	0	2
326	2017	0	1	2	1	3	3	0	0	5	1	2	0	0	1	1
327	2017	0	1	1	1	1	2	0	0	5	1	2	0	0	0	1
328	2017	0	0	0	1	2	2	0	0	4	1	2	1	0	0	2
329	2017	0	0	0	2	3	1	0	0	3	0	1	0	1	0	3
330	2017	0	0	0	2	3	2	0	0	5	1	2	0	0	0	1
331	2017	0	0	0	1	2	2	0	0	1	0	1	1	1	0	3
332	2017	0	1	0	1	2	2	0	0	4	1	2	0	0	0	3
333	2017	0	1	0	2	2	3	0	0	2	0	1	0	1	0	3
334	2017	1	1	0	1	3	3	0	0	3	1	1	0	0	0	2
335	2017	0	0	0	3	1	3	0	0	3	0	0	0	1	0	2
336	2017	0	1	1	1	1	3	0	0	4	1	2	0	0	0	2
337	2017	0	0	0	3	1	4	0	0	3	0	1	0	1	0	3
338	2017	0	1	1	1	2	3	0	0	2	0	0	0	0	0	2
339	2017	0	0	1	1	2	2	0	0	2	0	1	0	1	0	2
340	2017	0	1	1	1	1	3	0	2	3	1	1	0	0	0	2
341	2017	0	0	1	1	2	2	0	2	3	0	0	1	1	0	3
342	2017	0	1	0	1	2	2	0	2	3	1	2	0	1	0	2
343	2017	1	1	0	3	2	2	0	2	3	1	1	0	0	0	2
344	2017	0	1	0	2	1	1	0	2	1	0	0	0	1	0	3
345	2017	1	0	0	3	1	2	0	2	3	1	1	0	1	1	2
346	2017	0	0	0	3	2	2	0	2	2	0	0	0	1	0	3
347	2017	0	1	0	2	2	2	0	2	1	0	1	0	0	0	3
348	2017	0	1	2	1	1	3	0	2	2	0	0	0	0	0	2
349	2017	0	1	1	1	1	3	0	2	2	0	1	0	0	0	2
350	2017	0	1	1	1	2	3	0	2	4	1	2	0	0	0	2
351	2017	0	0	1	2	2	2	0	1	3	0	1	0	1	0	2
352	2017	0	0	0	1	2	2	0	1	1	0	1	0	1	0	3
353	2017	0	1	0	2	3	2	0	1	3	1	1	1	1	1	2
354	2017	0	1	1	1	2	3	0	1	3	0	1	0	0	1	2
355	2017	0	0	0	1	2	2	0	1	2	0	1	1	0	0	3
356	2017	0	1	1	1	3	4	0	1	3	1	2	0	0	0	2
357	2017	0	1	1	2	3	3	0	1	2	0	1	0	0	0	3
358	2017	0	0	0	4	2	2	0	1	3	1	1	0	1	1	2
359	2017	0	1	0	1	3	3	0	1	3	0	1	0	0	1	2
360	2017	0	0	1	1	1	2	0	1	3	0	1	0	0	0	2
361	2017	0	1	1	2	1	2	0	1	4	0	1	0	0	0	2
362	2017	0	0	1	2	1	2	0	1	4	1	2	0	0	0	1
363	2017	0	1	1	1	2	3	0	1	2	1	1	0	0	1	3
364	2017	0	0	0	3	1	4	0	1	2	0	0	1	1	0	3
365	2017	1	0	1	2	2	2	0	1	3	1	2	0	1	0	2
366	2017	0	1	0	3	2	1	0	1	2	0	1	0	1	0	3
367	2017	0	0	1	1	2	2	0	0	3	1	1	0	0	0	2
368	2017	0	1	2	2	2	3	0	0	3	1	1	0	0	0	2
369	2017	0	1	1	2	3	3	0	0	3	0	0	0	0	0	2
370	2017	0	1	2	2	1	3	0	0	3	1	1	0	0	0	2
371	2017	0	0	0	3	3	4	0	0	2	0	1	1	0	0	3
372	2017	1	1	1	1	2	2	0	0	3	1	1	0	0	0	3
373	2017	0	0	1	4	2	2	0	0	2	0	0	0	1	0	3
374	2017	0	0	1	2	1	1	0	0	2	0	1	0	0	0	2
375	2017	1	1	1	3	2	2	0	0	4	1	1	0	0	0	2
376	2017	0	0	0	1	2	2	0	0	2	0	1	0	1	0	3
377	2017	0	1	0	1	3	3	0	0	4	1	1	0	0	0	2
378	2017	0	0	1	1	2	2	0	0	3	0	1	0	1	0	2
379	2017	0	1	0	3	2	2	0	0	2	0	1	0	1	0	3
380	2017	0	0	1	2	2	2	0	0	2	1	1	0	1	0	2
381	2017	0	0	1	2	3	2	0	0	2	1	2	0	0	0	2
382	2017	0	1	1	1	3	3	0	0	2	0	1	0	0	0	3
383	2017	0	0	0	2	2	2	0	0	2	0	0	0	1	0	3
384	2017	0	1	0	2	2	2	0	0	2	1	1	0	0	0	2
385	2017	0	1	2	2	1	1	0	2	5	0	1	0	1	1	2
386	2017	1	1	1	2	2	3	0	2	4	0	0	0	1	0	2
387	2017	0	0	0	3	3	2	0	2	2	0	1	0	1	0	3
388	2017	0	0	1	3	1	2	0	2	3	0	0	0	1	0	2
389	2017	0	0	1	1	2	1	0	2	3	0	1	0	1	0	2
390	2017	0	1	1	1	2	3	0	1	3	1	1	0	0	0	2
391	2017	0	0	0	3	1	2	0	1	2	0	1	0	0	0	3
392	2017	0	1	0	2	2	3	0	1	1	0	1	0	1	0	3
393	2017	0	0	0	1	1	2	0	1	4	0	1	1	1	1	1
394	2017	0	0	0	1	2	2	0	1	3	0	1	0	0	0	3
395	2017	0	1	0	1	3	4	0	1	2	0	0	0	1	0	3
396	2017	0	1	2	1	2	3	0	1	3	0	1	0	0	0	2
397	2017	0	0	1	3	3	2	0	1	2	0	1	1	0	0	2
398	2017	0	1	1	2	3	2	0	1	5	1	0	0	1	0	1
399	2017	0	0	0	1	1	3	0	1	2	0	0	0	1	0	3
400	2017	0	1	2	1	1	3	0	1	2	0	0	0	1	0	3
401	2017	1	1	2	1	2	3	0	1	4	1	2	0	0	1	1
402	2017	0	0	0	2	3	2	0	1	2	0	1	0	1	0	3
403	2017	0	0	0	3	1	2	0	1	4	0	1	0	0	1	1
404	2017	0	0	0	2	3	2	0	1	2	0	2	1	1	0	3
405	2017	0	1	1	2	2	2	0	1	2	0	2	0	0	0	2
406	2017	0	1	0	1	3	3	0	1	4	0	1	0	1	1	2
407	2017	1	0	2	1	3	3	0	1	3	1	1	0	1	0	2
408	2017	0	0	0	1	1	2	0	1	4	1	2	0	1	1	2
409	2017	0	1	0	2	2	2	0	1	3	0	0	0	0	0	2
410	2017	0	0	0	2	1	2	0	1	1	0	0	1	1	0	3
411	2017	0	0	1	1	2	2	0	1	4	1	2	1	1	1	1
412	2017	0	0	1	2	2	3	0	1	4	0	1	0	0	1	3
413	2017	0	0	1	1	3	3	0	1	3	0	1	0	1	0	1
414	2017	0	0	2	1	2	3	0	1	3	1	1	0	1	0	2
415	2017	0	0	0	1	2	2	0	0	3	0	1	0	0	0	2
416	2017	0	0	0	2	2	2	0	0	2	0	1	0	1	0	3
417	2017	0	1	0	3	1	3	0	0	3	0	1	0	0	0	3
418	2017	0	1	0	3	1	2	0	0	2	0	1	0	0	1	3
419	2017	0	1	0	1	2	3	0	0	4	0	2	0	0	0	1
420	2017	0	1	1	2	2	3	0	0	2	0	1	0	0	0	2
421	2017	0	0	1	1	2	2	0	0	3	0	2	0	1	0	3
422	2017	0	0	0	1	2	2	0	0	3	1	2	0	1	0	2
423	2017	0	0	1	1	0	2	0	0	5	1	2	0	1	1	1
424	2017	0	1	2	1	1	3	0	0	2	0	2	0	0	0	2
425	2017	0	0	2	1	1	2	0	0	2	0	0	0	1	0	1
426	2017	0	0	0	1	3	2	0	0	4	0	1	0	1	0	2
427	2017	0	0	0	2	1	2	0	0	3	0	1	0	0	0	2
428	2017	0	0	1	1	2	2	0	0	3	0	1	0	0	0	2
429	2017	0	1	1	1	3	3	0	2	4	1	2	0	0	0	2
430	2017	0	0	0	3	2	2	0	2	3	1	2	0	1	0	2
431	2017	0	0	0	4	2	3	0	2	1	0	0	0	1	0	3
432	2017	0	0	0	3	3	2	0	2	2	0	1	0	0	0	3
433	2017	0	0	0	4	3	2	0	2	3	0	1	0	1	0	2
434	2017	0	1	0	1	3	4	0	2	5	0	1	0	0	0	1
435	2017	0	1	2	4	2	3	1	2	2	0	1	0	0	1	2
436	2017	0	0	0	4	3	4	0	2	3	0	0	0	1	0	2
437	2017	0	0	0	4	2	2	0	2	3	1	1	0	1	1	2
438	2017	0	1	1	3	1	1	0	2	2	0	1	0	1	0	3
439	2017	1	0	0	3	3	2	0	2	2	0	1	0	0	0	2
440	2017	0	1	0	3	0	3	0	2	2	0	1	0	1	0	3
441	2017	0	1	2	1	3	3	0	2	2	0	0	0	1	0	3
442	2017	0	1	0	3	3	3	0	2	3	1	1	0	0	0	2
443	2017	1	1	1	3	2	2	0	2	3	1	1	0	1	0	1
444	2017	0	1	0	1	3	3	0	2	4	1	1	1	0	1	1
445	2017	0	1	1	1	2	3	0	2	4	1	2	0	0	0	1
446	2017	0	1	1	1	3	2	0	2	5	1	1	0	0	1	1
447	2017	0	1	1	1	2	3	0	2	2	0	1	0	0	0	3
448	2017	0	1	2	1	3	3	0	2	3	1	2	0	0	0	1
449	2017	0	0	0	3	1	3	0	2	2	0	1	0	1	0	3
450	2017	0	1	2	1	1	3	0	2	2	0	1	0	0	1	1
451	2017	0	1	0	3	1	4	0	2	1	0	0	1	1	0	3
452	2017	0	0	0	3	3	2	0	2	5	1	2	0	0	0	2
453	2017	1	0	0	3	1	2	0	2	5	0	2	0	0	0	2
454	2017	0	0	1	1	1	2	0	2	2	0	0	0	0	0	2
455	2017	1	1	0	1	3	2	0	2	3	1	2	0	0	0	1
456	2017	0	1	2	1	1	3	0	2	1	0	0	0	1	0	2
457	2017	0	1	0	3	1	1	0	2	3	1	2	0	1	0	3
458	2017	0	1	1	1	1	3	0	2	2	0	1	0	0	0	2
459	2017	0	0	1	3	2	2	0	2	3	0	1	0	0	0	2
460	2017	0	1	1	3	2	2	0	2	3	0	0	0	0	1	1
461	2017	0	1	0	1	3	3	0	2	2	1	2	0	0	0	3
462	2017	0	0	0	3	1	3	0	2	2	1	2	0	0	0	3
463	2017	0	0	1	3	2	2	0	2	2	0	1	0	1	1	2
464	2017	0	0	2	2	2	2	0	2	2	1	1	0	0	0	2
465	2017	0	1	1	1	1	2	0	2	5	1	1	0	0	0	1
466	2017	0	1	0	1	2	2	0	2	4	1	1	0	0	0	2
467	2017	0	1	2	1	1	3	0	2	3	1	1	0	0	0	2
468	2017	0	1	1	3	1	2	0	2	3	1	1	0	1	0	2
469	2017	1	1	1	1	3	2	0	2	3	1	1	0	1	0	2
470	2017	0	1	1	2	1	1	0	2	4	1	0	0	1	0	2
471	2017	0	1	0	3	1	1	0	2	3	1	2	0	1	0	3
472	2017	0	1	0	1	1	4	0	2	4	0	1	1	0	0	1
473	2017	0	1	0	3	1	2	0	2	2	0	1	0	1	0	3
474	2017	0	1	0	3	1	3	0	2	1	0	0	1	0	0	3
475	2017	0	0	2	2	2	2	0	2	2	0	0	0	0	0	3
476	2017	0	0	1	3	3	4	0	2	3	1	2	0	1	1	3
477	2017	0	1	0	4	0	2	1	2	2	0	0	0	1	0	3
478	2017	0	0	0	4	1	2	0	2	2	0	1	1	1	0	3
479	2017	0	0	2	4	1	3	1	2	4	1	2	0	1	0	2
480	2017	0	0	0	2	3	2	0	1	3	0	2	0	1	1	2
481	2017	1	1	0	3	3	2	0	1	2	1	2	0	0	0	3
482	2017	0	1	0	2	2	2	0	1	1	1	2	0	0	0	3
483	2017	0	1	1	1	3	3	0	1	3	1	2	0	0	0	2
484	2017	0	1	0	1	1	4	0	1	3	0	1	0	0	0	3
485	2017	0	1	0	3	1	2	0	1	2	0	0	0	0	0	3
486	2017	0	1	0	4	3	4	1	1	2	0	1	0	1	0	3
487	2017	0	1	1	3	1	3	0	1	1	1	0	0	1	0	3
488	2017	0	0	0	3	2	4	0	1	3	1	1	0	0	0	2
489	2017	0	0	1	4	2	2	0	1	5	1	2	0	0	0	1
490	2017	0	1	0	3	2	3	0	1	3	0	0	0	1	0	3
491	2017	0	1	0	3	2	2	0	1	3	0	0	0	1	0	3
492	2017	0	1	2	1	2	3	0	1	1	1	1	0	0	0	1
493	2017	0	1	0	3	1	3	1	1	2	1	1	0	1	0	3
494	2017	0	0	0	4	2	2	0	1	1	1	0	0	1	0	3
495	2017	0	1	2	3	1	2	1	1	2	0	0	0	1	0	2
496	2017	0	1	0	1	2	2	0	1	3	0	2	0	0	0	3
497	2017	0	0	1	4	2	2	0	1	2	0	0	0	1	0	3
498	2017	0	1	0	3	1	2	0	1	2	1	1	0	1	1	3
499	2017	1	1	0	1	3	3	0	1	5	1	2	0	0	0	1
500	2017	0	0	2	2	2	2	0	1	2	0	0	0	1	0	2
501	2017	0	1	0	3	2	3	1	1	1	0	0	0	1	0	3
502	2017	0	0	0	3	1	1	0	1	2	0	2	0	0	0	3
503	2017	0	0	1	3	3	2	0	1	2	0	0	0	0	0	3
504	2017	0	1	0	3	3	1	0	1	2	0	1	0	1	0	3
505	2017	0	0	1	3	2	2	0	1	3	0	0	0	1	0	3
506	2017	0	0	0	2	2	2	1	1	1	0	2	0	1	0	3
507	2017	0	0	1	3	2	3	0	1	5	0	0	0	1	1	2
508	2017	0	1	0	3	1	3	0	1	3	1	1	1	1	0	2
509	2017	0	1	1	1	3	3	0	1	3	0	2	0	0	0	2
510	2017	0	1	0	1	2	3	0	1	4	0	1	0	1	0	2
511	2017	1	1	0	3	3	4	0	1	3	1	1	0	1	1	2
512	2017	0	0	1	3	1	2	0	1	3	0	1	0	1	0	3
513	2017	0	1	0	1	2	2	0	1	4	0	1	0	0	0	2
514	2017	1	1	2	1	1	3	0	1	5	0	2	0	0	0	1
515	2017	0	1	1	4	2	3	0	1	1	0	1	0	1	0	3
516	2017	0	0	2	1	3	3	0	1	2	1	1	0	1	0	2
517	2017	0	0	0	3	2	2	0	1	3	1	2	0	1	0	3
518	2017	0	1	0	3	2	2	0	1	2	0	1	0	0	0	3
519	2017	0	1	0	1	3	3	0	1	3	0	1	0	1	0	3
520	2017	0	1	0	1	3	4	0	1	4	0	1	0	1	0	2
521	2017	0	0	2	1	2	3	0	0	3	0	2	0	0	0	2
522	2017	0	0	0	3	2	2	0	0	3	0	1	0	0	0	3
523	2017	0	1	0	1	1	3	0	0	3	1	0	0	0	0	3
524	2017	0	0	1	1	1	2	0	0	5	0	2	0	0	0	1
525	2017	0	0	0	1	3	3	0	0	3	0	0	0	0	1	2
526	2017	0	1	0	3	3	2	0	0	4	0	1	0	0	0	1
527	2017	0	1	0	2	2	3	0	0	1	0	1	0	1	0	3
528	2017	0	1	1	1	3	2	0	0	3	0	2	0	0	0	2
529	2017	0	1	2	2	2	3	0	0	2	1	1	0	0	0	1
530	2017	1	1	2	1	2	3	0	0	3	1	1	0	0	0	1
531	2017	0	1	1	1	3	2	0	0	3	0	1	0	0	0	3
532	2017	0	1	1	1	2	3	0	0	5	1	2	0	0	0	1
533	2017	0	1	0	1	2	3	0	0	2	0	1	0	0	0	3
534	2017	0	0	0	1	2	2	0	0	3	0	0	0	0	0	3
535	2017	0	1	2	1	3	3	0	0	3	1	2	0	0	0	2
536	2017	1	1	0	1	3	3	0	0	3	1	2	0	0	0	3
537	2017	0	0	0	1	3	4	0	0	4	1	2	0	1	0	2
538	2017	0	0	0	3	3	4	0	0	2	1	2	0	1	0	2
539	2017	0	1	0	1	3	2	0	0	3	1	2	0	0	1	1
540	2017	0	0	1	3	2	2	0	0	3	1	0	0	1	0	3
541	2017	0	0	1	1	2	4	0	0	3	0	2	0	0	0	3
542	2017	0	0	2	1	1	2	0	2	3	0	2	0	0	0	1
543	2017	0	1	2	1	3	3	0	2	2	0	2	0	0	0	2
544	2017	0	1	1	1	2	3	0	2	4	1	1	0	0	0	2
545	2017	0	1	1	4	2	2	0	2	3	0	0	0	1	0	3
546	2017	0	1	1	4	1	1	0	2	2	0	0	0	1	0	3
547	2017	0	1	0	4	1	2	0	2	1	0	0	0	1	0	3
548	2017	0	1	1	4	1	3	0	2	2	0	1	0	1	0	3
549	2017	0	0	2	3	2	2	0	2	3	0	1	0	1	0	2
550	2017	0	0	0	3	2	1	0	2	2	0	1	0	1	0	3
551	2017	0	1	0	2	2	1	0	2	4	1	1	0	1	1	2
552	2017	0	0	0	2	2	2	0	2	3	0	0	0	0	0	2
553	2017	0	1	1	3	2	2	0	2	3	1	2	1	1	0	1
554	2017	0	1	0	1	1	4	0	2	1	0	0	0	0	0	3
555	2017	0	0	2	3	2	2	0	2	2	0	2	0	1	0	3
556	2017	0	1	0	1	3	1	0	2	2	0	1	0	0	0	3
557	2017	0	1	2	1	3	2	0	2	3	1	1	0	0	1	1
558	2017	0	1	1	1	1	3	0	2	2	0	0	0	0	0	3
559	2017	0	1	1	1	1	3	0	2	4	1	1	0	0	1	1
560	2017	0	1	0	2	3	4	0	2	2	1	2	0	1	0	2
561	2017	0	1	0	4	2	3	0	2	2	0	0	0	0	1	3
562	2017	0	1	2	1	2	3	0	2	3	0	0	0	0	1	2
563	2017	0	0	0	3	1	2	0	2	2	0	1	0	0	1	3
564	2017	0	1	2	2	2	3	0	2	2	0	0	0	0	0	1
565	2017	0	0	1	4	2	2	0	2	2	0	0	0	1	0	3
566	2017	0	0	0	4	3	2	0	2	2	0	0	0	1	0	3
567	2017	0	0	1	1	1	2	0	2	2	0	0	0	0	0	3
568	2017	0	1	0	3	3	3	0	2	2	1	1	0	1	0	2
569	2017	0	1	0	2	2	2	0	2	4	1	2	0	0	1	3
570	2017	0	0	0	4	2	2	0	2	2	0	0	0	1	0	3
571	2017	0	1	2	2	2	3	0	2	3	1	2	0	0	0	1
572	2017	0	0	1	1	3	2	0	2	4	0	1	0	0	0	3
573	2017	0	0	0	2	2	2	0	2	2	0	0	0	1	0	3
574	2017	0	0	0	3	1	2	0	2	2	0	1	0	1	1	3
575	2017	0	1	0	3	1	2	0	2	2	0	1	1	1	0	3
576	2017	0	0	0	4	1	2	0	2	2	0	0	0	1	0	3
577	2017	0	1	0	4	1	1	0	2	1	0	0	1	1	0	3
578	2017	0	0	0	2	3	2	0	2	2	0	0	0	1	0	3
579	2017	0	0	0	2	3	2	0	2	1	0	0	0	1	0	3
580	2017	0	1	0	2	2	2	0	2	2	0	0	0	1	0	1
581	2017	0	1	0	2	1	2	0	2	3	0	0	0	0	0	2
582	2017	0	1	0	3	2	3	0	2	2	0	1	0	1	0	3
583	2017	0	0	0	4	3	2	0	2	2	0	2	0	1	0	3
584	2017	0	0	1	3	3	3	0	2	3	1	1	0	1	1	1
585	2017	1	1	0	3	2	1	0	2	2	0	1	1	1	0	3
586	2017	0	0	0	1	3	2	0	2	3	0	2	0	1	0	3
587	2017	0	1	1	1	3	2	0	2	5	0	0	0	1	1	1
588	2017	0	1	0	4	3	1	0	2	2	0	2	0	1	0	2
589	2017	0	0	0	4	2	2	0	2	2	0	2	0	1	0	3
590	2017	0	0	1	1	3	2	0	2	5	0	1	0	1	1	1
591	2017	0	1	0	3	3	3	0	2	4	0	2	0	0	0	2
592	2017	0	0	0	1	1	2	0	2	3	0	1	0	0	0	2
593	2017	0	1	1	1	3	3	0	2	3	1	2	0	0	1	2
594	2017	0	1	0	3	1	4	0	2	2	0	1	0	0	0	3
595	2017	0	1	2	1	3	3	0	2	3	0	0	0	0	0	1
596	2017	0	1	1	1	1	4	0	2	3	0	0	0	0	0	3
597	2017	0	0	0	3	2	2	0	2	2	0	1	0	1	0	3
598	2017	0	0	0	4	3	4	0	2	2	0	1	0	1	0	3
599	2017	0	0	0	2	1	4	0	2	2	0	1	0	0	0	3
600	2017	0	1	1	2	2	3	0	2	3	1	0	0	0	1	2
601	2017	0	0	0	2	3	2	0	2	2	0	1	0	1	0	3
602	2017	0	1	1	1	2	3	0	2	3	1	1	0	0	0	2
603	2017	0	0	1	2	3	2	0	2	4	0	2	0	1	0	2
604	2017	1	0	0	2	3	2	0	2	2	1	1	0	0	0	3
605	2017	0	0	0	1	1	2	0	2	4	1	1	0	0	1	1
606	2017	0	0	1	2	2	2	0	2	3	0	1	0	1	0	2
607	2017	0	0	1	4	2	2	0	2	2	0	2	0	1	0	3
608	2017	0	1	1	1	3	3	0	2	5	0	2	0	0	0	1
609	2017	0	1	0	1	3	2	0	2	4	1	2	0	0	0	1
610	2017	0	0	0	2	2	2	0	2	2	0	2	0	1	0	3
611	2017	0	1	0	2	2	3	0	2	2	0	2	0	1	0	3
612	2017	0	1	0	1	2	3	0	2	2	0	1	0	0	0	3
613	2017	1	0	0	2	2	2	0	2	3	0	1	0	0	1	2
614	2017	0	1	0	2	2	2	0	2	3	1	1	0	0	0	2
615	2017	0	0	0	1	3	2	0	2	2	0	1	0	1	0	1
616	2017	0	1	1	1	3	3	0	2	3	1	2	0	0	0	3
617	2017	0	0	0	2	3	2	0	2	3	1	2	0	1	0	2
618	2017	0	1	0	1	1	2	0	2	3	0	1	0	0	0	1
619	2017	0	1	0	3	1	2	0	2	2	0	0	0	0	0	3
620	2017	0	0	1	1	2	3	0	2	2	0	2	0	1	0	3
621	2017	0	1	0	2	2	2	0	2	2	0	2	0	1	0	3
622	2017	1	0	2	1	2	2	0	2	3	1	1	0	1	0	2
623	2017	0	1	0	1	1	2	0	1	3	0	1	0	0	0	2
624	2017	0	0	1	2	2	2	0	1	3	0	0	0	1	0	2
625	2017	0	1	1	1	2	2	0	1	2	0	1	0	1	0	3
626	2017	0	1	1	1	1	3	0	1	2	0	1	0	0	0	3
627	2017	0	1	0	1	2	3	0	1	2	0	1	0	0	0	3
628	2017	0	1	1	1	3	3	0	1	2	0	1	0	1	0	3
629	2017	0	1	1	3	3	2	0	1	2	0	0	0	1	0	3
630	2017	0	1	1	2	2	2	0	1	2	0	1	0	0	0	2
631	2017	0	1	1	1	2	3	0	1	3	1	2	0	0	0	2
632	2017	0	0	1	1	2	2	0	1	3	1	2	0	0	0	3
633	2017	0	1	1	4	2	2	0	1	2	0	1	0	0	0	2
634	2017	0	0	0	3	1	2	0	1	1	0	0	0	1	0	3
635	2017	0	0	0	1	3	3	0	1	2	0	0	0	1	1	3
636	2017	0	0	1	2	2	3	0	1	2	0	1	0	1	0	3
637	2017	0	1	0	1	3	4	0	1	2	0	1	0	0	0	2
638	2017	0	1	0	2	2	3	0	1	2	0	1	0	1	0	3
639	2017	0	1	1	1	1	3	0	1	3	1	1	0	1	1	2
640	2017	0	1	1	1	2	3	0	1	2	0	1	0	1	0	3
641	2017	0	1	1	1	2	2	0	1	3	1	1	0	0	0	2
642	2017	0	1	0	1	3	3	0	1	3	0	1	0	0	0	2
643	2017	0	1	0	2	2	2	0	1	2	0	0	0	1	0	3
644	2017	0	1	1	1	1	3	0	1	4	0	1	0	0	0	1
645	2017	0	1	0	1	2	3	0	1	3	0	1	0	0	0	3
646	2017	0	0	0	1	2	3	0	1	3	1	1	0	0	0	3
647	2017	0	0	1	1	3	2	0	1	2	0	1	0	1	0	3
648	2017	0	1	0	1	1	2	0	1	2	0	1	0	0	0	2
649	2017	0	0	1	1	2	2	0	1	4	0	1	0	0	0	1
650	2017	0	1	1	1	2	2	0	1	2	0	1	0	0	0	3
651	2017	0	1	0	1	2	2	0	1	3	0	1	0	0	0	3
652	2017	0	1	1	1	2	3	0	1	3	0	1	0	0	0	2
653	2017	0	0	1	2	3	3	0	1	3	1	1	1	0	1	1
654	2017	0	1	1	2	2	2	0	1	2	0	1	0	0	0	3
655	2017	0	0	1	1	2	2	0	1	2	0	1	0	0	0	2
656	2017	0	0	0	2	3	3	0	1	2	0	1	1	1	0	3
657	2017	0	0	2	2	1	3	0	1	3	0	1	0	0	0	2
658	2017	0	0	0	1	3	2	0	1	4	0	1	0	0	1	2
659	2017	0	0	1	1	3	2	0	1	3	0	1	0	0	0	2
660	2017	0	1	0	1	2	3	0	1	2	0	1	0	1	0	1
661	2017	0	1	1	1	2	3	0	1	2	0	1	0	0	0	3
662	2017	0	1	1	1	3	3	0	1	3	1	1	0	0	0	3
663	2017	0	1	0	2	2	2	0	1	2	0	1	0	1	0	3
664	2017	0	1	0	3	1	1	0	1	5	0	0	0	0	1	1
665	2017	0	1	0	1	3	3	0	1	3	0	1	0	1	0	2
666	2017	0	1	0	1	2	3	0	1	2	0	1	0	0	0	3
667	2017	0	0	1	1	2	2	0	1	2	0	1	0	1	1	3
668	2017	1	1	1	1	3	2	0	1	4	1	1	0	1	1	2
669	2017	0	1	0	2	2	3	0	1	1	0	1	0	0	0	3
670	2017	0	0	0	1	1	2	0	1	2	0	1	1	1	0	3
671	2017	0	1	1	1	2	3	0	1	3	0	1	0	1	0	2
672	2017	1	1	1	1	3	2	0	1	3	1	1	0	0	0	2
673	2017	0	0	0	1	3	2	0	1	1	0	2	0	1	1	2
674	2017	0	1	1	1	3	2	0	1	2	0	0	0	1	0	3
675	2017	0	1	0	1	1	3	0	1	2	0	1	0	1	0	3
676	2017	0	0	0	1	1	2	0	1	2	0	0	0	1	0	2
677	2017	0	0	0	3	2	2	0	1	2	0	1	0	1	0	3
678	2017	0	0	0	2	2	2	0	1	2	0	2	0	0	0	3
679	2017	0	1	2	1	3	3	0	1	2	0	1	0	0	0	3
680	2017	0	1	0	1	3	2	0	1	2	0	1	0	0	0	2
681	2017	0	0	0	2	1	2	0	1	3	0	1	0	1	0	2
682	2017	1	1	1	1	2	3	0	1	4	1	1	0	0	0	1
683	2017	0	1	1	1	3	3	0	1	2	1	2	0	1	0	1
684	2017	0	1	1	1	2	3	0	1	2	0	0	0	0	0	2
685	2017	0	1	0	1	2	3	0	1	2	0	1	0	0	0	3
686	2017	0	1	1	1	3	3	0	1	5	1	2	0	0	0	1
687	2017	0	1	1	1	3	3	0	1	3	0	1	0	1	1	1
688	2017	0	1	1	1	2	3	0	1	4	0	1	0	0	0	3
689	2017	0	1	0	1	2	2	0	1	2	0	0	0	1	0	3
690	2017	0	1	1	1	1	3	0	1	2	0	1	0	0	1	1
691	2017	0	1	1	1	2	2	0	1	3	0	1	0	0	0	2
692	2017	0	0	1	1	2	3	0	1	4	0	1	1	0	1	1
693	2017	0	1	0	1	2	2	0	1	2	0	2	0	1	0	2
694	2017	0	1	0	1	3	2	0	1	4	0	0	0	0	0	1
695	2017	0	0	1	2	1	2	0	0	3	1	2	0	1	0	2
696	2017	0	1	2	1	2	2	0	0	3	0	0	0	0	0	1
697	2017	0	0	1	2	0	2	0	0	3	0	1	1	1	0	1
698	2017	0	0	0	1	2	2	0	0	2	0	0	0	0	0	3
699	2017	0	1	1	1	3	3	0	0	3	0	2	0	0	0	3
700	2017	0	0	0	1	3	2	0	0	3	0	0	1	0	0	3
701	2017	0	1	0	1	3	4	0	0	2	0	1	0	0	0	3
702	2017	0	0	1	1	2	2	0	0	2	0	1	0	0	0	3
703	2017	0	0	0	1	1	1	0	0	2	0	1	0	0	0	3
704	2017	0	1	0	1	3	3	0	0	4	1	2	0	0	0	1
705	2017	0	0	2	1	1	1	0	0	3	0	0	0	1	0	3
706	2017	0	1	0	1	3	2	0	0	4	1	2	0	0	0	1
707	2017	0	1	1	1	3	3	0	0	4	1	0	0	0	0	3
708	2017	0	1	1	1	2	2	0	0	2	0	1	0	0	0	3
709	2017	0	0	2	1	2	2	0	0	3	0	0	0	1	0	1
710	2017	0	1	1	1	3	2	0	0	2	0	1	0	1	1	3
711	2017	0	1	1	1	2	3	0	0	2	0	1	0	0	0	3
712	2017	0	1	0	2	2	2	0	0	2	0	0	0	0	0	3
713	2017	0	0	0	1	2	2	0	0	2	0	1	0	0	0	3
714	2017	0	1	0	1	3	2	0	0	2	0	1	0	0	0	3
715	2017	0	0	1	2	1	3	0	0	4	0	1	0	0	0	1
716	2017	0	0	0	1	2	2	0	0	5	1	2	0	1	1	1
717	2017	0	1	1	1	3	3	0	0	3	0	1	0	0	0	2
718	2017	0	1	2	1	3	3	0	0	4	0	2	0	0	0	1
719	2017	0	0	1	1	2	2	0	0	2	0	2	0	1	0	3
720	2017	0	1	0	1	1	2	0	0	2	0	1	0	1	0	3
721	2017	0	1	0	2	3	2	0	0	2	0	1	0	0	0	3
722	2017	0	1	0	1	3	1	0	0	4	1	2	0	0	1	1
723	2017	0	1	2	1	2	1	0	0	2	0	1	0	0	0	1
724	2017	0	1	0	1	2	3	0	0	3	1	1	0	0	0	1
725	2017	0	0	1	1	1	3	0	0	3	0	1	1	1	0	2
726	2017	0	0	2	1	1	2	0	0	2	0	0	0	1	0	3
727	2017	0	1	0	2	3	2	0	2	2	0	1	0	0	0	3
728	2017	0	0	0	2	3	2	0	2	2	0	1	0	0	0	3
729	2017	0	1	1	2	2	2	0	2	3	1	1	0	1	0	2
730	2017	0	1	1	2	2	3	0	2	3	0	2	0	0	0	3
731	2017	0	0	0	2	1	2	0	2	4	0	1	1	0	0	3
732	2017	0	1	2	2	2	2	0	2	5	1	2	0	1	0	2
733	2017	0	0	2	3	1	4	0	2	1	0	0	0	0	0	2
734	2017	0	1	0	3	1	2	0	2	2	0	1	0	0	0	3
735	2017	0	1	1	4	2	3	0	2	2	0	1	0	1	0	3
736	2017	1	0	0	3	1	2	0	2	3	0	1	1	1	1	2
737	2017	0	0	0	2	2	2	0	2	2	0	1	0	1	0	3
738	2017	0	1	1	2	3	3	0	2	4	1	2	0	0	0	2
739	2017	0	0	2	3	1	2	0	1	2	0	1	0	1	0	3
740	2017	0	1	0	3	1	2	0	1	2	0	0	0	1	0	3
741	2017	0	1	0	3	3	2	0	1	3	0	2	0	0	0	2
742	2017	0	0	0	2	2	1	0	1	2	0	0	1	1	0	3
743	2017	0	1	0	3	1	2	0	1	3	0	1	0	0	1	3
744	2017	0	1	0	2	3	3	0	1	3	0	2	0	0	0	3
745	2017	0	0	1	2	2	2	0	1	4	0	1	0	1	0	2
746	2017	0	1	1	2	3	2	0	1	3	1	1	0	1	0	3
747	2017	0	0	0	2	1	2	0	1	2	0	1	0	1	0	3
748	2017	0	0	0	2	1	2	0	1	2	0	1	0	0	0	3
749	2017	0	1	0	3	1	3	0	0	2	0	1	0	0	0	3
750	2017	0	0	1	3	1	2	0	0	2	0	0	0	1	0	3
751	2017	0	1	1	1	2	2	0	0	3	0	2	0	0	0	2
752	2017	0	1	1	3	1	3	0	0	2	0	1	0	0	0	3
753	2017	0	1	2	3	1	1	0	0	3	0	1	0	0	0	2
754	2017	0	1	1	1	1	3	0	0	4	0	2	0	0	0	1
755	2017	0	0	1	3	1	3	0	0	1	0	0	0	0	0	3
756	2017	0	1	0	1	1	3	0	0	3	0	0	0	1	0	3
757	2017	0	0	0	3	2	2	0	0	3	0	1	0	1	0	3
758	2017	0	1	2	2	2	3	0	0	4	0	1	0	0	0	2
759	2017	0	0	0	2	2	2	0	0	2	0	0	0	1	0	3
760	2017	0	1	1	2	3	2	0	0	3	1	1	0	1	0	2
761	2017	0	0	0	4	2	1	0	0	2	0	2	0	0	0	3
762	2017	0	1	1	3	2	1	0	0	1	0	1	0	1	0	2
763	2017	0	0	2	2	1	1	0	0	3	0	1	0	1	0	2
764	2017	0	0	2	2	2	2	0	0	2	0	1	0	1	0	2
765	2017	0	0	1	3	2	1	0	0	2	0	1	0	1	0	3
766	2017	0	0	0	3	3	2	0	0	2	0	1	0	1	0	2
767	2017	0	1	1	1	2	3	0	0	4	0	1	0	0	0	2
768	2017	1	0	1	2	3	3	0	0	3	1	1	0	1	1	2
769	2017	1	1	0	2	2	3	0	0	3	0	0	0	0	0	2
770	2017	0	1	0	3	2	3	0	2	3	1	1	0	0	0	3
771	2017	0	1	2	4	1	1	0	2	2	0	1	0	0	0	3
772	2017	0	1	0	3	1	2	0	2	3	0	2	0	0	1	2
773	2017	0	1	1	3	1	3	0	2	3	0	0	0	0	0	1
774	2017	0	1	1	2	1	3	0	2	3	1	2	0	0	0	2
775	2017	0	0	0	3	1	2	0	2	4	1	2	0	1	1	2
776	2017	0	1	0	4	2	2	0	2	2	0	0	0	1	0	3
777	2017	0	1	1	1	1	1	0	2	3	1	1	0	0	0	1
778	2017	0	0	1	3	3	2	0	1	4	0	1	0	0	0	2
779	2017	0	0	0	3	2	1	0	1	2	0	1	0	1	0	3
780	2017	1	1	2	2	1	2	0	1	4	0	2	0	0	0	2
781	2017	0	0	0	3	1	1	0	0	2	0	1	0	1	0	3
782	2017	0	1	1	1	2	3	0	0	3	0	2	0	0	0	2
783	2017	0	0	1	3	2	2	0	0	2	0	1	0	1	0	3
784	2017	0	1	0	2	1	2	0	0	2	0	1	0	1	0	3
785	2017	0	1	1	2	1	3	0	0	3	0	1	0	1	0	2
786	2017	0	1	0	3	2	2	0	0	1	0	1	0	1	0	3
787	2017	0	1	0	2	2	3	0	0	3	1	1	0	1	0	3
788	2017	0	0	0	2	3	2	0	0	2	0	1	1	1	0	3
789	2017	0	1	0	3	2	3	0	0	3	0	1	0	0	0	2
790	2017	0	0	1	2	2	2	0	0	3	1	2	0	0	0	2
791	2017	0	1	2	2	3	3	0	0	2	0	0	0	1	0	2
792	2017	0	1	1	2	1	2	0	0	3	1	1	0	0	0	1
793	2017	0	1	0	2	2	2	0	0	2	0	2	0	1	0	3
794	2017	0	0	1	3	2	2	0	0	2	0	1	0	1	0	3
795	2017	0	0	1	3	1	3	0	0	2	0	0	1	1	1	2
796	2017	0	1	2	2	3	3	0	0	1	0	1	0	0	0	3
797	2017	0	1	1	3	2	1	0	0	2	1	2	0	1	0	1
798	2017	0	0	1	3	2	2	0	0	2	0	1	0	1	0	2
799	2017	0	0	0	2	3	2	0	0	2	0	1	0	0	0	3
800	2017	0	0	1	4	1	2	0	0	2	0	1	0	1	1	3
801	2017	0	0	0	2	2	3	0	0	2	0	0	0	1	0	3
802	2017	0	1	1	3	1	1	0	0	2	0	0	0	1	0	3
803	2017	0	1	1	3	2	2	0	0	4	1	0	0	0	0	1
804	2017	0	1	1	1	2	3	0	2	3	1	2	0	0	1	2
805	2017	0	0	0	4	2	2	0	2	4	0	1	0	0	1	2
806	2017	0	0	1	3	2	3	0	2	3	1	1	0	1	0	2
807	2017	0	1	0	3	2	3	0	2	3	0	1	1	0	0	3
808	2017	0	1	0	4	2	2	0	2	3	0	1	0	1	0	3
809	2017	0	1	0	3	0	2	0	2	4	0	0	0	0	0	2
810	2017	0	0	0	4	2	4	0	2	3	1	2	0	0	0	2
811	2017	0	1	0	2	2	3	0	2	2	1	2	0	1	0	2
812	2017	0	0	0	4	2	2	0	2	2	0	1	0	1	1	3
813	2017	0	0	0	3	2	3	0	2	3	0	1	0	0	0	3
814	2017	0	0	1	4	1	2	0	2	1	0	1	0	0	0	3
815	2017	0	1	0	3	1	2	0	2	2	0	1	0	1	0	3
816	2017	0	1	0	4	1	3	0	2	3	1	1	0	1	0	3
817	2017	0	0	1	2	1	3	0	2	3	1	1	0	1	1	2
818	2017	0	1	1	3	3	3	0	2	2	0	1	0	1	0	2
819	2017	0	0	1	2	3	1	0	2	3	0	2	0	1	1	2
820	2017	0	0	0	4	1	4	0	2	2	0	1	1	0	0	3
821	2017	0	1	0	4	1	2	0	2	3	0	1	0	0	0	2
822	2017	0	1	0	3	2	2	0	2	3	0	1	1	1	0	2
823	2017	0	1	2	2	1	3	0	2	3	0	1	0	0	0	2
824	2017	1	1	0	1	3	2	0	2	3	1	1	0	0	1	1
825	2017	0	0	1	3	3	2	0	2	4	1	2	0	0	0	1
826	2017	0	1	1	2	3	3	0	2	4	0	1	0	1	0	2
827	2017	0	1	1	1	1	3	0	2	3	1	2	0	0	0	2
828	2017	0	1	2	1	1	3	0	2	2	0	1	0	0	0	3
829	2017	0	1	0	3	2	4	0	2	4	1	1	0	1	0	2
830	2017	0	1	0	3	1	3	0	2	3	0	0	1	1	0	2
831	2017	0	0	0	3	2	2	0	2	2	0	1	0	1	0	3
832	2017	0	1	0	1	3	3	0	2	2	0	0	0	1	0	3
833	2017	0	1	2	3	1	3	0	2	4	0	1	0	0	0	2
834	2017	1	1	2	2	1	3	0	2	4	1	2	0	0	0	2
835	2017	0	0	1	3	1	2	0	2	3	0	2	0	1	0	2
836	2017	0	1	2	4	2	3	0	2	2	0	0	0	1	0	3
837	2017	0	1	1	3	2	3	0	2	2	0	1	0	1	0	3
838	2017	0	0	1	3	3	2	0	2	3	0	1	0	1	0	2
839	2017	0	0	1	2	1	2	0	2	2	0	0	0	1	0	3
840	2017	0	0	0	3	1	2	0	2	4	0	1	0	0	0	2
841	2017	0	0	0	3	1	2	0	2	3	1	2	1	1	0	3
842	2017	0	1	0	3	0	3	0	2	2	0	0	1	1	0	3
843	2017	0	1	1	3	2	2	0	2	3	0	1	0	1	1	3
844	2017	0	1	1	3	3	2	0	2	2	0	1	0	1	0	3
845	2017	0	0	1	3	1	1	0	2	2	0	0	0	0	0	2
846	2017	0	1	0	2	2	2	0	2	3	1	1	0	0	0	3
847	2017	0	0	0	3	2	2	0	2	3	0	1	0	0	1	2
848	2017	1	0	1	4	2	2	0	2	3	1	2	0	1	0	2
849	2017	0	1	1	4	1	4	0	2	2	0	1	0	0	0	3
850	2017	0	1	0	3	2	3	0	2	2	0	0	0	1	0	3
851	2017	0	1	2	1	2	3	0	2	3	1	1	0	0	0	2
852	2017	0	1	1	2	1	2	0	2	3	0	2	0	0	0	2
853	2017	0	0	1	3	1	2	0	2	2	0	1	0	1	0	3
854	2017	0	1	1	1	2	2	0	2	3	1	2	0	1	1	2
855	2017	0	0	1	3	1	2	0	2	2	0	1	0	1	0	3
856	2017	0	1	1	2	1	2	0	2	2	0	1	0	1	0	3
857	2017	0	0	2	2	1	3	0	2	3	0	1	0	1	0	3
858	2017	1	0	0	4	2	3	0	2	2	0	1	0	1	0	3
859	2017	0	0	1	3	2	2	0	2	3	0	1	0	1	0	2
860	2017	0	1	0	3	1	2	0	2	2	0	0	1	1	0	2
861	2017	0	1	2	1	2	3	0	2	3	0	1	0	0	0	2
862	2017	0	1	1	1	1	2	0	2	4	1	1	0	0	0	2
863	2017	0	1	0	3	2	2	0	2	5	0	2	1	1	0	2
864	2017	0	1	2	1	2	3	0	2	3	1	2	0	1	1	2
865	2017	0	1	2	4	1	1	0	2	2	0	0	0	0	0	3
866	2017	0	0	1	3	1	2	0	2	3	1	2	0	0	1	3
867	2017	0	0	2	1	2	2	0	2	2	0	2	1	1	0	3
868	2017	0	1	1	2	1	2	0	2	4	0	1	0	0	0	2
869	2017	0	1	0	3	1	3	0	2	2	0	0	0	0	0	3
870	2017	0	0	0	2	2	4	0	2	2	0	0	1	1	0	3
871	2017	0	1	2	3	1	3	0	2	4	1	2	0	0	0	2
872	2017	0	1	1	4	2	1	0	2	2	0	1	1	1	0	3
873	2017	0	0	0	3	3	2	0	2	2	1	1	0	1	0	3
874	2017	0	1	1	3	1	2	0	2	2	0	0	0	1	0	3
875	2017	0	1	0	3	1	2	0	2	1	0	1	1	1	0	3
876	2017	0	1	0	3	1	2	0	2	2	0	0	0	1	0	3
877	2017	0	1	1	2	3	3	0	2	3	1	1	0	0	0	2
878	2017	0	1	0	3	3	3	0	2	3	1	2	0	0	0	3
879	2017	0	0	0	4	1	2	0	2	3	1	2	0	1	0	2
880	2017	0	1	0	3	2	3	0	2	2	0	1	0	0	0	3
881	2017	0	1	1	4	1	3	0	2	2	0	0	0	1	0	2
882	2017	0	0	0	4	2	2	0	2	2	0	1	0	0	0	3
883	2017	0	1	1	2	2	1	0	2	2	0	0	1	1	0	3
884	2017	0	0	1	2	2	2	0	2	2	0	1	0	0	0	3
885	2017	0	1	1	3	3	2	0	2	4	1	1	0	1	0	2
886	2017	0	1	0	3	2	2	0	2	2	0	1	0	1	0	3
887	2017	0	1	0	3	1	3	0	2	2	0	0	0	0	0	3
888	2017	0	1	0	3	1	2	0	2	3	0	2	1	1	0	3
889	2017	0	1	0	4	1	4	0	2	2	0	1	0	0	0	3
890	2017	0	0	2	3	1	2	0	2	2	0	1	1	1	0	3
891	2017	0	1	1	3	2	3	0	2	4	0	1	0	1	0	2
892	2017	1	1	1	1	3	3	0	2	4	1	2	0	1	0	2
893	2017	0	1	1	4	1	3	0	2	1	0	0	0	1	0	3
894	2017	0	1	0	4	1	4	0	2	2	0	0	0	0	0	3
895	2017	0	1	0	2	1	3	0	2	4	1	1	0	0	0	1
896	2017	0	1	1	2	3	3	0	2	2	0	1	0	0	0	3
897	2017	0	0	0	2	2	4	0	2	2	0	1	0	1	0	3
898	2017	0	0	0	3	1	1	0	2	3	0	1	0	1	0	2
899	2017	0	0	0	4	2	2	0	2	2	1	2	0	1	0	3
900	2017	0	0	0	3	2	2	0	2	4	0	0	1	1	0	2
901	2017	0	1	2	1	1	2	0	2	3	0	1	0	0	0	2
902	2017	0	0	0	3	2	2	0	2	2	0	0	0	1	0	3
903	2017	0	1	1	3	3	3	0	2	4	1	1	0	0	1	1
904	2017	0	1	0	3	1	2	0	2	1	0	0	1	1	0	3
905	2017	0	0	1	2	2	2	0	2	2	0	1	0	0	0	3
906	2017	0	0	0	2	3	2	0	2	4	1	1	0	1	0	3
907	2017	0	1	0	4	3	2	0	2	2	0	0	0	0	0	3
908	2017	0	0	0	4	2	3	0	2	2	0	1	0	1	0	3
909	2017	0	0	0	3	3	2	0	2	2	0	2	0	0	0	3
910	2017	0	0	1	2	2	2	0	2	3	1	1	0	0	0	2
911	2017	0	1	2	4	2	3	0	2	3	0	1	0	0	0	2
912	2017	0	1	0	2	2	3	0	2	5	1	1	0	0	1	2
913	2017	0	1	0	2	2	3	0	2	3	0	1	0	0	0	3
914	2017	0	0	1	3	2	2	0	2	2	0	1	0	1	0	3
915	2017	0	0	0	2	2	2	0	2	2	0	1	0	1	0	3
916	2017	0	0	0	3	2	2	0	2	3	0	1	0	1	0	3
917	2017	0	1	1	2	2	3	0	2	3	1	1	0	0	0	3
918	2017	0	0	1	3	1	2	0	2	4	0	2	0	0	1	1
919	2017	0	0	0	2	3	2	0	2	3	0	2	0	1	1	2
920	2017	0	1	2	2	0	3	0	2	3	1	1	0	0	1	2
921	2017	0	0	0	3	2	2	0	2	3	0	1	0	1	0	2
922	2017	0	0	1	1	2	3	0	2	3	0	1	1	1	0	2
923	2017	0	1	1	3	2	3	0	2	1	0	0	0	1	0	3
924	2017	0	1	1	1	1	3	0	2	3	1	1	0	0	0	2
925	2017	0	1	0	2	2	3	0	2	2	0	1	0	1	0	3
926	2017	0	1	1	1	2	3	0	2	4	0	1	0	0	0	2
927	2017	0	0	0	4	2	2	0	2	2	0	0	0	1	0	3
928	2017	0	1	0	1	1	2	0	2	5	1	1	0	0	0	2
929	2017	0	1	0	3	2	2	0	2	3	0	0	0	1	0	2
930	2017	0	1	0	2	3	2	0	2	3	0	0	0	0	0	2
931	2017	0	1	1	1	1	2	0	2	2	0	1	0	0	0	3
932	2017	0	1	1	2	1	3	0	2	2	0	1	0	0	0	3
933	2017	0	1	2	2	2	3	0	2	4	1	1	0	0	1	1
934	2017	0	1	0	3	2	4	0	2	3	0	1	0	1	0	2
935	2017	0	0	0	3	3	2	0	2	2	0	1	0	1	0	3
936	2017	0	1	0	2	2	2	0	2	2	0	1	0	1	0	2
937	2017	0	1	2	1	1	3	0	2	1	0	0	0	0	0	1
938	2017	0	0	0	2	2	2	0	2	3	1	2	0	1	0	2
939	2017	0	0	0	4	2	2	0	2	3	0	2	0	1	1	2
940	2017	0	1	0	3	3	4	1	2	3	0	0	1	0	0	3
941	2017	0	1	0	3	2	2	0	2	3	0	1	0	1	0	3
942	2017	0	0	0	3	3	2	0	2	2	1	2	1	1	0	3
943	2017	0	1	0	3	3	2	0	2	3	0	1	0	0	0	2
944	2017	0	1	1	1	2	3	0	2	4	0	1	0	0	0	2
945	2017	0	0	0	3	2	2	0	2	4	1	1	1	0	1	2
946	2017	0	1	1	1	1	3	0	2	4	0	1	0	0	0	1
947	2017	1	0	1	3	1	3	0	2	2	0	1	0	1	1	2
948	2017	0	0	1	2	2	3	0	2	2	0	0	1	0	1	2
949	2017	0	0	0	3	2	2	0	2	5	0	2	0	1	0	1
950	2017	0	0	1	3	2	3	0	2	5	1	1	0	0	1	1
951	2017	0	0	2	2	2	2	0	2	2	0	1	0	1	0	3
952	2017	0	0	0	4	1	2	0	2	3	0	0	0	1	0	2
953	2017	0	1	0	2	3	2	0	2	3	1	1	0	1	0	3
954	2017	1	1	0	3	1	4	0	2	4	1	1	0	0	1	2
955	2017	0	1	0	3	2	1	0	2	3	0	1	0	1	0	3
956	2017	0	1	0	3	3	2	0	1	4	0	1	0	0	0	3
957	2017	0	0	0	3	2	2	0	1	2	0	2	0	1	0	3
958	2017	0	0	0	2	2	2	0	1	3	0	1	0	1	0	2
959	2017	0	0	0	2	3	2	0	1	3	0	1	1	1	0	2
960	2017	0	1	1	2	1	2	0	1	3	1	2	0	0	1	1
961	2017	0	0	0	2	2	2	0	1	3	0	1	0	0	0	2
962	2017	0	0	1	2	2	2	0	1	3	0	1	0	1	0	3
963	2017	0	0	0	2	2	3	0	1	2	0	1	0	1	0	3
964	2017	0	0	0	3	3	2	0	1	4	0	1	0	1	1	2
965	2017	0	1	0	3	3	3	0	1	3	1	1	0	0	0	2
966	2017	0	1	2	3	2	3	0	1	2	0	1	0	0	0	3
967	2017	0	0	0	3	1	2	0	1	2	0	0	1	1	0	3
968	2017	0	1	0	3	2	3	0	1	3	0	1	0	0	0	2
969	2017	0	1	0	2	2	3	0	1	2	0	1	0	1	0	2
970	2017	0	1	1	2	3	2	0	1	3	0	1	0	0	0	3
971	2017	0	0	1	3	2	2	0	1	3	0	2	0	1	0	3
972	2017	0	1	1	3	1	3	0	1	2	0	1	0	1	0	3
973	2017	0	1	1	3	2	1	0	0	2	0	1	0	0	0	3
974	2017	0	1	1	2	2	2	0	0	3	1	1	0	0	0	3
975	2017	0	0	0	4	2	2	0	0	2	0	1	0	1	0	3
976	2017	0	1	1	2	2	2	0	0	3	1	1	0	1	0	2
977	2017	0	1	2	1	3	3	0	0	4	1	2	0	0	0	2
978	2017	0	1	2	3	3	3	0	0	3	1	1	0	0	0	2
979	2017	0	0	0	3	2	3	0	0	2	0	1	1	1	0	3
980	2017	0	0	0	3	2	3	0	0	2	0	1	0	1	0	3
981	2017	0	0	0	3	2	2	0	0	2	1	2	0	1	0	2
982	2017	0	0	2	3	2	4	0	0	2	0	0	1	1	0	2
983	2017	0	1	1	3	3	1	0	0	3	0	0	0	1	0	3
984	2017	0	0	1	3	2	1	0	0	2	0	1	0	0	0	3
985	2017	0	0	0	2	3	1	0	0	3	1	1	0	0	1	2
986	2017	0	1	2	3	2	3	0	0	3	0	1	0	0	1	2
987	2017	0	1	0	2	2	3	0	0	3	1	1	0	1	0	3
988	2017	0	0	1	2	2	2	0	0	2	0	1	0	0	0	2
989	2017	0	1	0	3	2	2	0	0	3	0	1	0	1	0	2
990	2017	0	0	0	3	2	2	0	0	1	0	2	0	1	0	3
991	2017	0	0	0	3	2	2	0	0	2	0	1	0	1	0	3
992	2017	0	1	1	2	2	3	0	0	4	1	2	0	0	0	2
993	2017	0	1	0	3	3	2	0	0	2	0	2	0	1	0	2
994	2017	0	1	0	2	1	2	0	0	2	0	1	0	0	0	3
995	2017	0	1	2	2	2	3	0	0	2	0	0	0	0	0	2
996	2017	0	1	1	2	2	2	0	0	3	0	0	0	0	1	2
997	2017	0	0	1	4	1	2	0	0	2	0	1	0	1	0	3
998	2017	0	1	2	2	3	2	0	0	3	1	2	0	0	0	2
999	2017	0	0	2	2	2	2	0	0	4	0	1	0	0	0	2
1000	2017	0	1	0	3	1	3	0	0	1	0	1	0	1	0	2
1001	2017	0	1	1	2	2	2	0	0	3	1	2	0	0	0	3
1002	2017	0	0	1	1	2	3	0	0	3	0	1	0	1	1	2
1003	2017	0	1	1	2	0	3	0	0	4	1	2	0	0	0	2
1004	2017	0	1	0	3	3	2	0	0	3	0	2	0	1	0	2
1005	2017	0	0	1	2	2	2	0	0	2	0	1	1	1	0	3
1006	2017	0	1	1	2	2	2	0	0	3	1	1	0	0	0	1
1007	2017	0	1	1	3	1	1	0	0	2	0	1	0	0	1	2
1008	2017	0	0	0	2	3	1	0	0	2	0	1	0	1	0	2
1009	2017	0	1	1	1	1	2	0	0	1	0	0	0	1	0	3
1010	2017	0	0	0	3	2	2	0	0	2	0	2	0	1	1	3
1011	2017	0	1	2	2	0	3	0	0	1	0	1	0	0	0	2
1012	2017	0	0	2	2	2	3	0	0	2	0	0	0	0	0	3
1013	2017	0	0	2	1	2	2	0	0	3	0	0	0	0	1	2
1014	2017	0	1	0	2	1	3	0	0	2	0	1	0	1	0	3
1015	2017	0	1	1	3	2	2	0	0	3	0	2	0	0	1	2
1016	2017	0	0	0	3	3	2	0	0	2	0	1	0	1	0	3
1017	2017	0	0	2	1	3	2	0	0	3	0	1	0	1	0	3
1018	2017	0	0	0	3	3	2	0	0	2	1	2	0	1	0	3
1019	2017	0	0	1	2	3	1	0	0	2	0	1	0	1	0	3
1020	2017	0	1	1	3	2	2	0	0	3	0	0	0	1	1	3
1021	2017	0	1	0	3	2	2	0	0	3	0	1	0	0	0	2
1022	2017	0	0	0	2	2	2	0	0	2	0	0	1	1	0	3
1023	2017	0	1	0	3	2	3	0	0	5	1	2	0	0	0	2
1024	2017	0	0	1	3	2	2	0	0	3	1	2	0	0	0	2
1025	2017	0	1	2	1	1	3	0	0	3	0	0	0	0	0	2
1026	2017	0	1	0	3	2	3	0	0	2	0	1	0	0	0	3
1027	2017	0	0	0	3	3	1	0	0	3	0	1	0	1	0	3
1028	2017	1	0	2	2	1	3	0	0	4	1	1	0	0	0	1
1029	2017	0	0	2	3	3	2	0	0	2	0	1	0	0	1	3
1030	2017	0	1	2	3	2	2	0	0	2	0	1	0	0	0	3
1031	2017	0	1	2	3	3	3	0	0	3	0	1	0	0	0	2
1032	2017	0	0	0	3	1	2	0	0	2	0	1	0	1	0	3
1033	2017	0	0	0	3	2	2	0	0	1	0	1	0	1	0	3
1034	2017	0	0	0	3	1	2	0	0	2	0	1	1	1	0	3
1035	2017	0	1	1	3	2	3	0	0	3	1	1	0	1	1	3
1036	2017	0	0	2	3	3	2	0	0	2	0	1	0	1	0	3
1037	2017	0	0	1	3	3	2	0	0	4	0	1	0	1	1	2
1038	2017	0	1	2	2	0	3	0	2	3	1	2	0	0	0	2
1039	2017	0	1	0	2	2	3	0	2	3	0	2	0	1	0	2
1040	2017	0	1	1	4	2	2	0	2	2	0	1	0	1	0	3
1041	2017	0	1	0	2	3	4	0	2	3	1	2	0	1	0	2
1042	2017	0	1	1	2	1	3	0	2	4	0	1	0	0	1	1
1043	2017	0	0	0	3	2	2	0	2	2	0	1	1	1	0	3
1044	2017	0	1	2	2	1	3	0	2	3	1	1	0	0	0	2
1045	2017	0	1	0	2	2	2	0	2	3	0	0	0	1	0	2
1046	2017	0	1	0	3	1	3	0	2	2	0	0	1	1	0	3
1047	2017	0	0	0	4	2	2	0	2	2	0	1	1	1	0	3
1048	2017	0	1	2	2	1	3	0	2	4	1	2	0	0	0	1
1049	2017	0	1	1	3	2	3	0	2	2	0	0	0	1	0	3
1050	2017	1	1	1	4	3	2	0	2	3	1	2	0	1	0	2
1051	2017	0	0	1	3	2	2	0	2	3	0	1	0	1	0	2
1052	2017	0	1	0	3	1	4	0	2	2	0	0	0	1	0	2
1053	2017	0	0	1	2	2	2	0	2	3	0	1	0	1	0	3
1054	2017	0	1	1	2	2	3	0	2	3	1	1	0	1	0	2
1055	2017	0	1	1	4	3	2	0	2	3	1	2	0	1	0	2
1056	2017	0	0	0	4	1	2	0	2	2	0	1	0	1	0	3
1057	2017	0	1	2	2	3	1	0	2	3	1	1	0	0	1	1
1058	2017	0	0	0	3	1	2	0	2	3	0	1	1	1	0	2
1059	2017	0	1	0	3	2	2	0	2	2	0	1	0	0	0	3
1060	2017	0	1	1	2	1	2	0	2	3	0	0	0	1	0	2
1061	2017	0	1	0	4	2	4	0	2	2	0	1	1	1	0	3
1062	2017	0	1	1	2	2	3	0	2	4	1	2	0	1	0	1
1063	2017	0	1	0	2	3	2	0	2	2	0	1	0	0	0	3
1064	2017	0	0	0	2	3	1	0	2	2	0	1	0	1	1	1
1065	2017	0	1	1	2	2	3	0	2	4	0	1	0	0	0	1
1066	2017	0	1	2	2	2	3	0	2	3	1	1	0	1	1	2
1067	2017	0	1	1	2	1	3	0	2	4	1	0	0	1	1	1
1068	2017	0	0	0	2	2	2	0	2	2	0	1	0	1	0	3
1069	2017	0	1	1	2	3	1	0	2	4	0	2	0	0	1	1
1070	2017	0	1	0	2	1	4	0	2	2	0	1	1	1	0	3
1071	2017	0	1	0	3	1	1	0	2	3	0	0	0	1	0	2
1072	2017	0	1	1	2	2	2	0	2	5	1	2	0	0	0	1
1073	2017	1	1	0	3	2	2	0	2	3	0	1	0	1	0	2
1074	2017	0	1	0	3	1	2	0	2	3	1	2	1	1	0	2
1075	2017	0	0	2	3	2	3	0	2	3	1	1	0	1	0	2
1076	2017	0	1	1	2	2	3	0	2	3	0	1	0	0	0	1
1077	2017	0	1	2	2	2	3	0	2	3	0	1	0	0	0	2
1078	2017	0	1	1	2	1	3	0	2	3	0	1	0	1	0	3
1079	2017	0	1	0	2	1	2	0	2	3	0	0	0	1	0	3
1080	2017	0	0	0	4	2	4	0	2	2	0	0	0	1	0	2
1081	2017	0	1	0	2	3	2	0	2	2	0	0	0	1	0	3
1082	2017	0	0	0	3	3	2	0	2	2	0	1	0	1	0	2
1083	2017	0	0	2	2	2	3	0	2	3	0	0	0	1	0	2
1084	2017	0	1	1	3	1	2	0	2	3	1	2	0	1	0	2
1085	2017	0	1	2	3	3	3	1	2	3	0	1	0	1	0	2
1086	2017	0	0	0	4	3	2	0	2	3	0	1	0	1	0	2
1087	2017	0	0	0	2	3	1	0	2	2	0	1	0	1	0	3
1088	2017	0	0	1	2	1	3	0	2	3	0	1	1	1	0	2
1089	2017	0	1	0	3	0	2	0	2	2	0	1	0	0	0	3
1090	2017	0	1	0	2	1	3	0	2	2	0	1	0	1	0	3
1091	2017	0	0	0	2	1	2	0	2	3	0	2	0	1	1	2
1092	2017	0	1	0	2	3	2	0	2	3	1	1	0	1	1	2
1093	2017	0	1	1	4	0	1	0	2	3	0	1	1	1	0	2
1094	2017	0	1	1	2	1	2	0	2	3	0	2	0	0	0	2
1095	2017	0	0	1	2	3	2	0	2	5	0	1	0	0	0	1
1096	2017	0	1	0	3	3	3	0	2	3	1	2	0	1	0	2
1097	2017	0	0	0	2	3	2	0	2	4	0	1	0	1	0	1
1098	2017	0	1	1	2	2	2	0	2	3	0	1	0	1	0	2
1099	2017	0	0	0	2	3	2	0	2	2	0	0	0	1	0	3
1100	2017	0	0	1	2	2	2	0	2	3	1	2	0	0	0	2
1101	2017	0	0	1	2	2	2	0	2	3	0	1	0	1	0	2
1102	2017	0	1	1	3	1	2	0	2	2	0	1	0	1	0	3
1103	2017	0	1	0	4	1	3	0	2	4	1	2	0	1	0	2
1104	2017	0	0	1	4	1	2	0	2	2	0	0	0	1	0	3
1105	2017	0	1	1	3	3	2	0	2	3	1	2	0	1	0	1
1106	2017	0	1	1	4	2	3	0	2	3	0	1	0	0	0	3
1107	2017	0	1	1	1	2	3	0	2	2	0	2	0	0	0	3
1108	2017	0	0	0	4	1	2	0	2	2	0	1	0	1	0	3
1109	2017	0	0	0	4	2	3	0	2	3	0	0	0	1	0	3
1110	2017	0	0	0	2	2	2	0	2	2	1	1	1	1	0	3
1111	2017	0	0	2	2	1	3	0	2	2	0	1	0	1	0	2
1112	2017	0	1	1	2	2	3	0	2	4	1	1	0	0	0	1
1113	2017	0	1	0	3	2	2	0	2	3	0	0	0	1	0	2
1114	2017	0	0	0	2	2	2	0	2	3	0	1	0	1	1	2
1115	2017	0	0	0	3	1	4	0	2	2	0	1	0	1	0	2
1116	2017	0	1	1	3	2	3	0	2	2	0	0	0	1	0	3
1117	2017	0	0	1	4	2	2	0	2	3	0	1	0	1	0	2
1118	2017	0	1	2	3	1	1	1	2	4	1	1	0	1	0	1
1119	2017	0	1	1	3	1	3	0	2	2	0	1	0	1	0	3
1120	2017	0	1	0	3	1	2	0	2	2	1	1	0	1	0	3
1121	2017	0	0	1	4	2	2	0	2	2	0	1	0	1	0	3
1122	2017	0	1	0	4	2	2	0	2	2	0	0	0	1	0	2
1123	2017	0	1	0	4	2	4	0	2	3	1	2	0	1	0	2
1124	2017	0	1	1	4	3	2	0	2	5	0	2	0	0	0	1
1125	2017	0	0	1	2	2	2	0	2	2	0	0	0	1	0	3
1126	2017	0	1	0	3	1	3	0	2	3	1	1	0	1	0	3
1127	2017	0	1	0	2	2	2	0	2	3	0	0	0	1	0	2
1128	2017	0	1	0	2	3	2	0	2	3	1	1	0	1	0	2
1129	2017	0	1	0	1	3	4	0	2	3	1	2	0	1	0	2
1130	2017	0	1	0	3	3	4	0	2	2	0	1	0	0	0	3
1131	2017	0	1	1	1	3	3	0	2	4	0	0	0	0	0	2
1132	2017	0	1	0	4	3	2	0	2	2	0	1	0	1	0	3
1133	2017	0	1	0	2	3	2	0	2	3	1	1	0	1	0	2
1134	2017	0	1	2	2	2	3	0	2	4	1	2	0	1	0	2
1135	2017	0	1	0	3	1	2	0	2	3	0	2	0	1	0	2
1136	2017	0	1	1	2	2	2	0	1	2	0	1	0	1	0	3
1137	2017	0	1	0	2	3	2	0	1	3	0	1	0	0	0	2
1138	2017	0	1	1	2	2	3	0	1	2	1	1	1	1	0	3
1139	2017	0	0	1	2	2	3	0	1	2	0	1	0	1	0	3
1140	2017	0	0	1	2	2	2	0	1	4	0	0	0	1	0	2
1141	2017	0	1	0	4	2	1	0	1	2	0	2	0	1	0	3
1142	2017	0	1	0	2	2	2	0	1	3	0	0	0	1	1	2
1143	2017	0	0	1	4	1	2	0	1	2	0	0	0	1	0	3
1144	2017	0	1	1	2	1	1	0	1	3	0	0	0	0	0	2
1145	2017	0	0	2	4	2	2	0	1	2	0	0	0	0	0	2
1146	2017	0	1	1	2	1	3	0	1	2	0	1	0	1	0	3
1147	2017	0	0	0	3	1	4	0	1	2	0	0	0	0	1	3
1148	2017	0	1	2	2	1	3	0	1	2	0	1	0	0	1	3
1149	2017	0	1	0	2	2	3	0	1	2	0	1	0	1	0	3
1150	2017	0	0	0	2	2	2	0	1	2	0	1	0	1	0	3
1151	2017	0	1	0	2	3	2	0	1	2	0	0	0	1	0	2
1152	2017	0	0	0	2	2	2	0	1	2	1	2	0	1	0	3
1153	2017	0	0	0	2	2	2	0	1	2	0	1	0	1	0	3
1154	2017	0	1	1	2	3	3	0	1	3	1	1	0	0	0	2
1155	2017	0	0	1	2	2	2	0	1	3	0	0	0	1	0	3
1156	2017	0	0	1	2	2	4	0	1	2	0	1	1	1	0	3
1157	2017	0	0	1	1	3	3	0	1	3	0	0	0	1	1	2
1158	2017	0	0	2	1	1	2	0	1	5	1	2	0	1	1	1
1159	2017	0	1	0	2	3	2	0	1	2	0	1	0	1	0	3
1160	2017	0	1	2	2	2	3	0	1	4	1	1	0	0	0	2
1161	2017	0	0	0	3	3	3	0	1	2	0	1	1	1	0	3
1162	2017	0	1	1	1	3	3	0	1	4	1	1	0	0	0	2
1163	2017	0	1	1	2	1	2	0	1	3	1	2	0	0	0	2
1164	2017	0	1	1	2	2	3	0	1	4	1	2	0	0	0	1
1165	2017	0	1	1	1	1	3	0	1	2	0	1	0	0	0	3
1166	2017	0	0	2	2	2	2	0	1	3	0	1	0	0	1	2
1167	2017	0	1	0	2	2	3	0	1	4	0	0	0	0	1	3
1168	2017	0	1	0	3	2	2	0	1	2	0	1	0	1	0	3
1169	2017	0	1	1	3	0	3	0	1	2	0	0	0	1	0	2
1170	2017	0	1	0	3	1	2	0	1	2	0	0	1	1	0	3
1171	2017	0	0	1	4	1	2	0	1	4	1	2	0	0	0	1
1172	2017	0	1	0	2	3	3	0	1	2	0	0	0	0	0	3
1173	2017	0	1	0	2	3	2	0	1	3	0	1	0	0	0	1
1174	2017	0	1	0	3	2	2	0	1	2	0	0	0	1	0	3
1175	2017	0	1	1	2	2	3	0	1	2	0	1	0	1	0	3
1176	2017	0	1	0	2	2	2	0	1	2	0	1	0	0	0	3
1177	2017	0	1	1	2	3	3	0	1	3	1	1	0	0	0	2
1178	2017	0	0	1	2	3	3	0	1	3	1	1	0	1	0	2
1179	2017	0	1	1	1	3	3	0	1	3	1	2	0	0	0	2
1180	2017	0	1	0	2	3	3	0	1	4	1	2	0	0	0	2
1181	2017	0	0	1	2	1	1	0	1	5	0	1	1	1	1	1
1182	2017	0	1	0	2	1	2	0	1	2	0	0	0	1	0	3
1183	2017	0	0	0	4	2	2	0	1	3	0	1	0	1	0	2
1184	2017	1	1	0	2	3	2	0	1	4	1	2	0	1	1	1
1185	2017	0	1	1	2	2	2	0	1	3	1	1	0	1	0	2
1186	2017	0	1	0	3	1	2	0	1	3	1	1	0	1	0	2
1187	2017	0	1	0	2	2	3	0	1	3	0	0	0	1	0	2
1188	2017	0	1	1	1	3	3	0	1	2	0	1	0	1	0	2
1189	2017	0	1	1	2	2	3	0	1	4	0	1	0	1	0	1
1190	2017	0	1	1	2	2	3	0	1	3	1	2	0	0	0	1
1191	2017	0	1	0	3	1	2	0	1	2	0	1	0	1	0	3
1192	2017	0	1	0	3	1	1	0	1	3	0	1	0	1	0	3
1193	2017	0	1	1	2	2	3	0	1	3	1	2	0	1	0	2
1194	2017	0	1	1	2	2	3	0	1	2	0	2	0	1	0	3
1195	2017	0	1	1	1	1	2	0	1	3	0	1	0	1	0	3
1196	2017	0	1	0	3	0	1	0	1	2	0	1	0	1	0	3
1197	2017	0	1	0	3	1	2	0	1	4	1	1	0	0	0	2
1198	2017	0	0	0	2	3	2	0	1	2	0	1	0	1	0	3
1199	2017	0	1	1	2	1	3	0	1	3	1	1	0	0	1	2
1200	2017	0	1	1	4	3	3	0	1	1	0	0	0	1	0	3
1201	2017	0	0	0	2	3	2	0	1	3	1	2	0	1	1	3
1202	2017	0	1	0	3	3	3	0	1	2	1	1	0	0	0	2
1203	2017	0	1	0	2	2	2	0	1	2	0	0	0	0	0	3
1204	2017	0	1	1	2	3	3	0	1	3	1	1	0	0	0	2
1205	2017	0	0	1	2	2	3	0	1	2	0	2	0	0	1	2
1206	2017	0	1	1	2	2	3	0	1	2	0	1	0	0	0	3
1207	2017	0	1	2	2	3	3	0	1	3	1	2	0	0	0	3
1208	2017	0	1	0	3	3	1	0	1	3	0	1	0	1	0	2
1209	2017	0	0	0	2	2	2	0	1	2	1	2	0	1	0	3
1210	2017	0	1	2	1	1	3	0	1	2	0	1	0	1	0	2
1211	2017	0	0	1	1	2	1	0	1	5	1	1	1	1	0	2
1212	2017	0	0	0	2	1	2	0	1	3	0	1	0	1	0	2
1213	2017	0	1	1	2	1	2	0	1	4	1	2	0	0	1	1
1214	2017	0	0	0	2	1	1	0	1	3	0	0	0	1	0	3
1215	2017	0	1	0	3	2	3	0	1	3	1	1	0	0	0	3
1216	2017	0	0	0	3	2	3	0	1	2	0	2	0	1	0	3
1217	2017	0	1	0	2	1	3	0	1	3	1	1	0	0	0	3
1218	2017	0	0	0	4	1	2	0	1	3	0	0	0	1	1	2
1219	2017	1	1	1	2	2	3	0	1	3	1	2	0	0	1	1
1220	2017	0	1	0	1	3	4	0	1	3	0	1	0	0	1	3
1221	2017	0	1	1	2	3	3	0	1	3	1	2	0	1	0	2
1222	2017	0	0	1	2	3	3	0	1	3	0	1	0	1	0	3
1223	2017	0	1	0	3	2	2	0	1	2	0	1	0	1	1	3
1224	2017	0	0	0	2	3	2	0	1	4	0	1	0	1	0	2
1225	2017	0	1	2	2	1	3	0	1	2	0	0	0	0	0	2
1226	2017	0	1	0	3	2	4	0	1	4	0	0	1	1	0	2
1227	2017	0	1	0	1	2	3	0	1	3	0	0	0	0	1	2
1228	2017	0	0	0	4	2	2	0	1	3	0	2	0	1	0	2
1229	2017	0	1	0	4	2	3	0	1	2	0	2	0	1	0	3
1230	2017	0	1	0	3	1	3	0	1	2	0	2	1	1	0	3
1231	2017	0	1	0	2	2	3	0	1	2	0	0	0	0	0	3
1232	2017	0	1	0	2	3	2	0	1	3	0	2	0	0	0	2
1233	2017	0	0	1	2	2	2	0	1	3	1	1	0	0	1	2
1234	2017	0	0	0	2	2	2	0	1	2	0	1	0	1	0	3
1235	2017	0	0	0	2	2	2	0	1	2	0	1	0	1	0	3
1236	2017	0	1	1	2	3	2	0	1	3	1	1	0	0	0	1
1237	2017	0	1	2	1	2	3	0	1	3	1	1	0	0	0	2
1238	2017	0	1	2	2	3	3	0	1	3	0	2	0	0	0	1
1239	2017	0	1	0	2	3	3	0	1	3	0	0	0	0	1	2
1240	2017	0	1	2	2	3	3	0	1	2	1	1	0	0	0	3
1241	2017	0	0	1	2	3	2	0	1	2	0	1	0	1	0	3
1242	2017	0	1	2	2	1	1	0	1	3	1	0	0	0	0	2
1243	2017	0	0	0	2	1	3	0	1	3	0	0	1	1	1	2
1244	2017	0	0	1	2	2	2	0	1	4	1	1	0	0	0	1
1245	2017	0	0	0	2	2	1	0	1	2	0	1	1	1	0	3
1246	2017	0	1	1	2	2	3	0	1	3	0	1	0	1	1	2
1247	2017	0	1	1	2	3	3	0	1	3	0	2	0	0	0	1
1248	2017	0	1	2	1	1	3	0	1	2	0	0	0	0	0	2
1249	2017	0	1	1	3	3	2	0	1	3	0	1	0	0	0	1
1250	2017	0	0	1	2	3	1	0	1	2	1	2	0	1	1	2
1251	2017	0	0	0	2	3	2	0	1	2	0	1	1	1	0	3
1252	2017	0	1	0	4	1	4	0	1	3	0	1	0	0	0	2
1253	2017	0	0	0	3	1	2	0	1	2	0	1	0	1	0	2
1254	2017	0	0	0	4	2	2	0	1	3	1	2	1	0	1	2
1255	2017	0	1	0	2	2	2	0	1	3	1	1	0	0	0	2
1256	2017	0	1	1	2	2	3	0	1	3	0	1	0	0	0	3
1257	2017	0	1	0	3	2	4	0	1	2	0	0	0	1	0	3
1258	2017	0	1	0	2	3	2	0	1	3	1	1	0	1	0	3
1259	2017	0	0	2	2	1	3	0	1	3	0	2	0	1	1	2
1260	2017	0	0	0	2	2	2	0	1	2	0	0	0	1	0	3
1261	2017	0	1	0	2	3	3	0	1	3	0	1	0	0	0	3
1262	2017	0	1	0	2	2	2	0	1	2	0	2	0	1	0	3
1263	2017	0	1	0	3	2	4	0	1	2	1	2	0	0	0	3
1264	2017	0	1	0	2	2	2	0	1	3	0	1	0	1	0	3
1265	2017	0	1	2	1	2	3	0	1	4	0	1	0	0	0	1
1266	2017	0	1	0	2	3	2	0	1	2	0	1	0	1	0	3
1267	2017	0	0	0	2	3	1	0	1	3	0	1	1	0	1	3
1268	2017	0	1	1	1	1	3	0	1	4	1	1	0	0	1	2
1269	2017	0	1	1	2	3	3	0	1	2	0	0	0	1	0	3
1270	2017	0	0	0	3	3	2	0	1	2	1	1	0	1	0	3
1271	2017	0	1	0	2	3	2	0	1	2	0	1	0	0	0	3
1272	2017	0	1	0	2	2	2	0	1	2	0	1	0	1	0	3
1273	2017	0	0	1	2	1	2	0	0	2	0	0	0	1	0	3
1274	2017	0	0	2	2	2	4	0	0	3	0	1	0	0	0	2
1275	2017	0	1	1	2	1	2	0	0	2	0	1	0	0	0	1
1276	2017	0	1	1	2	2	3	0	0	2	0	1	0	0	0	3
1277	2017	0	0	0	3	2	2	0	0	2	0	1	0	1	0	3
1278	2017	0	0	1	2	1	3	0	0	1	0	1	0	1	0	3
1279	2017	0	1	0	4	2	1	0	0	3	0	0	0	0	0	2
1280	2017	0	1	1	2	3	2	0	0	4	1	2	0	0	0	2
1281	2017	0	0	0	2	1	2	0	0	2	0	1	0	1	0	3
1282	2017	0	1	1	2	2	3	0	0	4	0	1	0	0	0	2
1283	2017	1	0	0	2	1	2	0	0	3	0	1	0	1	0	2
1284	2017	1	1	0	3	1	4	0	0	2	0	0	0	1	0	3
1285	2017	1	0	1	2	2	2	0	0	3	0	0	1	1	0	2
1286	2017	0	0	0	2	1	2	0	0	2	0	0	1	1	0	3
1287	2017	0	1	0	2	3	3	0	0	2	0	1	0	1	0	3
1288	2017	0	0	0	2	3	1	0	0	3	0	2	1	1	0	3
1289	2017	0	1	1	1	2	2	0	0	2	0	1	0	0	0	2
1290	2017	0	1	1	2	2	3	0	0	3	0	0	0	0	1	2
1291	2017	0	1	1	2	2	2	0	0	2	0	1	0	0	0	3
1292	2017	0	1	1	2	3	4	0	0	3	0	2	0	0	0	3
1293	2017	0	1	0	3	1	2	0	0	2	0	0	1	0	0	3
1294	2017	0	1	1	2	0	2	0	0	3	1	1	0	0	0	3
1295	2017	0	0	0	1	3	4	0	0	2	0	1	0	1	0	1
1296	2017	0	1	0	2	1	2	0	0	2	1	2	0	0	0	3
1297	2017	0	1	0	2	3	2	0	0	2	0	1	0	1	0	3
1298	2017	0	0	0	2	3	2	0	0	3	0	1	0	1	1	3
1299	2017	0	0	1	1	1	3	0	0	3	0	2	0	1	0	3
1300	2017	0	1	2	2	3	2	0	0	4	1	1	0	0	0	1
1301	2017	0	1	0	2	2	2	0	0	3	1	0	0	1	0	3
1302	2017	0	0	2	1	1	3	0	0	2	0	0	0	1	0	2
1303	2017	0	1	0	2	2	2	0	0	3	0	1	0	1	0	3
1304	2017	0	0	0	2	3	1	0	0	2	1	1	1	1	0	2
1305	2017	0	0	0	2	1	3	0	0	2	0	2	0	1	0	3
1306	2017	0	0	2	2	1	2	0	0	3	1	1	0	1	0	2
1307	2017	0	0	0	2	2	2	0	0	3	0	1	0	1	1	2
1308	2017	0	1	1	1	3	3	0	0	2	0	1	0	0	0	3
1309	2017	0	1	1	2	2	3	0	0	4	0	1	0	1	0	2
1310	2017	0	0	0	2	2	2	0	0	3	1	1	0	0	1	2
1311	2017	0	1	1	2	3	2	0	0	3	0	0	0	0	1	3
1312	2017	0	1	2	1	1	3	0	0	3	0	1	0	0	0	2
1313	2017	0	1	1	1	1	3	0	0	4	1	1	0	0	1	1
1314	2017	1	0	1	2	2	1	0	0	3	1	1	0	1	0	3
1315	2017	0	0	1	1	3	1	0	0	4	1	1	0	1	0	1
1316	2017	0	0	0	2	1	1	0	0	2	0	1	0	1	0	3
1317	2017	0	1	0	2	2	3	0	0	2	0	0	0	0	0	3
1318	2017	0	0	0	2	2	2	0	0	2	0	1	0	1	0	3
1319	2017	0	1	1	1	2	3	0	0	3	1	0	0	0	0	1
1320	2017	0	1	0	2	2	2	0	0	3	1	1	0	0	0	2
1321	2017	0	0	1	2	2	1	0	0	2	0	2	0	0	0	2
1322	2017	0	1	2	2	3	3	0	2	3	1	0	0	0	0	1
1323	2017	0	0	0	2	1	2	0	2	2	0	1	0	1	0	3
1324	2017	0	1	1	2	2	3	0	2	1	0	0	0	0	0	3
1325	2017	0	1	2	2	1	1	0	2	2	0	0	0	0	0	2
1326	2017	0	1	0	3	2	1	0	2	2	0	1	0	1	0	3
1327	2017	0	0	0	2	2	2	0	2	1	0	0	1	0	0	3
1328	2017	0	1	1	2	3	3	0	2	2	0	2	0	0	0	3
1329	2017	0	1	1	2	2	3	0	2	3	0	1	0	1	0	2
1330	2017	1	0	0	3	1	2	0	2	2	0	0	0	1	0	3
1331	2017	0	0	0	3	3	2	0	2	2	0	2	0	1	0	2
1332	2017	0	0	1	3	1	2	0	2	1	0	0	1	1	0	3
1333	2017	0	1	0	3	1	3	0	2	3	0	1	0	1	0	2
1334	2017	0	0	0	4	1	1	0	2	2	0	1	0	1	0	3
1335	2017	0	1	1	4	1	2	0	2	1	0	0	0	1	0	3
1336	2017	0	1	0	3	2	3	1	2	2	0	0	1	1	0	3
1337	2017	0	1	0	3	3	4	0	2	3	1	2	0	0	0	2
1338	2017	0	1	1	2	3	3	0	2	5	1	2	0	0	0	2
1339	2017	0	0	0	2	1	2	0	2	3	0	0	1	0	0	3
1340	2017	0	0	1	2	2	2	0	2	5	1	2	0	0	0	1
1341	2017	0	0	1	1	1	1	0	2	3	1	2	0	0	0	3
1342	2017	0	0	2	1	1	2	0	2	4	0	1	0	1	0	3
1343	2017	0	0	0	3	1	2	0	2	4	1	1	0	0	1	2
1344	2017	0	1	1	1	2	3	0	2	2	0	1	0	0	0	2
1345	2017	0	1	2	3	1	3	0	2	2	1	0	0	1	0	2
1346	2017	0	1	0	4	1	4	0	2	2	0	0	0	1	0	3
1347	2017	0	1	1	2	2	4	0	2	3	1	1	0	0	0	3
1348	2017	0	1	0	2	1	4	0	2	2	0	2	0	1	0	3
1349	2017	0	1	0	2	1	3	0	2	3	0	0	0	0	0	2
1350	2017	0	1	2	1	2	3	0	2	4	1	2	0	0	0	1
1351	2017	0	1	0	3	2	4	0	2	2	0	1	0	1	0	3
1352	2017	0	1	0	3	1	2	0	2	1	0	0	0	1	0	3
1353	2017	0	0	0	4	1	2	0	2	2	0	1	1	0	0	3
1354	2017	0	0	0	4	3	1	0	2	2	0	1	0	1	1	3
1355	2017	0	1	0	2	3	4	1	2	3	0	2	0	0	1	3
1356	2017	0	0	0	4	1	2	0	2	1	0	0	1	1	0	3
1357	2017	0	0	1	3	1	2	0	2	3	0	0	0	1	0	2
1358	2017	0	1	1	1	3	3	0	2	3	1	0	0	1	0	2
1359	2017	0	1	0	2	2	2	0	2	3	0	1	0	1	0	3
1360	2017	0	0	0	2	2	2	0	2	3	0	1	0	1	0	3
1361	2017	0	0	0	2	1	1	0	2	3	0	1	0	0	0	2
1362	2017	0	0	1	2	2	2	0	2	2	0	1	0	1	0	3
1363	2017	0	0	0	3	3	4	0	2	3	0	2	1	1	0	3
1364	2017	0	0	0	3	3	2	0	2	2	0	1	0	1	0	3
1365	2017	0	0	0	3	1	2	0	2	1	0	2	0	1	0	3
1366	2017	0	0	1	3	3	2	0	2	3	1	1	0	1	0	2
1367	2017	0	1	1	1	3	3	0	2	2	1	2	0	1	0	2
1368	2017	0	1	0	3	1	3	0	2	2	0	1	0	0	0	3
1369	2017	1	1	1	3	2	2	0	2	3	1	1	0	0	1	1
1370	2017	0	1	0	3	1	4	0	2	3	1	2	0	1	0	3
1371	2017	0	0	0	2	3	2	0	2	2	0	1	0	1	0	3
1372	2017	0	1	0	3	3	2	0	2	4	1	1	0	1	0	2
1373	2017	0	1	0	1	3	3	0	2	3	1	2	0	0	0	2
1374	2017	0	1	0	2	2	2	0	2	3	0	0	0	1	0	3
1375	2017	0	0	1	2	2	2	0	2	3	0	2	0	1	0	3
1376	2017	0	1	1	2	2	3	0	2	3	1	2	0	0	0	2
1377	2017	0	1	2	2	3	3	0	2	4	0	1	0	0	0	2
1378	2017	0	1	0	3	1	2	0	2	2	0	1	0	1	0	3
1379	2017	0	0	1	4	2	2	0	2	2	0	1	0	1	0	3
1380	2017	0	0	1	3	1	2	0	2	3	1	1	0	0	1	2
1381	2017	0	1	0	2	1	3	0	2	2	1	0	0	1	0	2
1382	2017	0	0	0	3	2	2	0	2	2	0	1	0	0	0	3
1383	2017	0	0	0	2	1	2	0	2	2	0	1	0	0	0	3
1384	2017	0	1	0	4	2	3	0	2	2	1	1	0	1	0	3
1385	2017	0	1	1	1	3	3	0	2	2	0	1	0	0	0	3
1386	2017	0	0	0	2	3	2	0	2	4	1	1	0	0	0	2
1387	2017	0	1	1	2	3	3	0	2	4	1	1	0	0	0	2
1388	2017	0	1	0	3	2	3	0	2	4	0	1	0	1	1	1
1389	2017	0	1	0	2	2	2	0	2	4	1	1	0	1	0	2
1390	2017	0	0	0	2	3	2	0	2	2	0	0	0	1	0	3
1391	2017	0	0	0	3	1	2	0	2	2	0	0	0	1	0	3
1392	2017	0	0	1	3	2	2	0	2	1	0	1	0	1	1	3
1393	2017	0	1	0	4	1	3	1	2	1	0	0	0	1	0	3
1394	2017	0	0	0	3	3	1	0	2	4	1	2	0	0	1	1
1395	2017	0	1	0	4	1	2	0	2	3	1	1	1	1	0	3
1396	2017	0	0	0	3	3	2	0	1	2	0	2	0	1	0	3
1397	2017	0	1	0	2	3	4	0	1	5	0	1	0	0	0	3
1398	2017	0	0	0	2	1	2	0	1	1	0	0	0	1	0	3
1399	2017	0	1	1	2	2	2	0	1	3	1	0	0	1	1	2
1400	2017	0	0	1	3	2	2	0	1	3	0	2	0	1	0	2
1401	2017	0	0	0	3	2	2	0	1	1	0	1	0	0	0	3
1402	2017	0	0	1	3	3	4	1	1	5	0	2	0	0	1	2
1403	2017	0	1	2	2	3	3	0	1	2	0	1	0	0	0	3
1404	2017	0	1	2	1	2	3	0	1	2	0	1	0	0	0	2
1405	2017	0	0	0	2	2	2	0	1	4	1	1	0	0	1	2
1406	2017	0	0	1	2	2	3	0	1	3	1	1	0	1	0	2
1407	2017	0	1	1	2	1	3	0	1	2	0	1	0	0	0	3
1408	2017	0	0	1	1	1	3	0	1	2	1	1	0	0	0	3
1409	2017	0	0	0	2	3	2	0	1	3	0	2	0	1	0	2
1410	2017	0	1	0	1	3	2	0	1	2	0	1	0	0	0	3
1411	2017	0	1	0	2	1	2	0	1	3	0	0	0	0	0	3
1412	2017	0	0	1	2	2	2	0	1	2	1	1	0	0	0	3
1413	2017	0	1	1	2	2	3	0	1	3	1	2	0	1	0	2
1414	2017	0	1	0	3	1	2	0	1	2	1	1	0	1	0	3
1415	2017	0	1	0	3	2	3	0	1	2	0	1	0	1	0	3
1416	2017	1	1	0	1	2	2	0	1	4	1	1	0	0	0	2
1417	2017	0	1	1	3	1	3	0	1	2	0	0	0	1	0	3
1418	2017	0	0	1	2	2	2	0	1	2	0	1	0	1	0	2
1419	2017	0	1	0	2	1	3	0	1	2	0	1	0	1	0	3
1420	2017	0	1	2	2	2	3	0	1	3	1	0	0	0	0	1
1421	2017	0	0	0	3	3	2	0	1	3	1	1	0	1	1	3
1422	2017	0	0	1	1	3	2	0	1	3	1	1	0	1	0	2
1423	2017	0	1	1	2	3	3	0	1	1	0	0	0	1	0	3
1424	2017	0	0	0	2	1	1	0	1	2	0	1	0	0	0	1
1425	2017	0	0	1	1	1	2	0	1	3	0	2	1	1	0	3
1426	2017	0	1	0	2	1	2	0	1	3	1	1	0	1	1	2
1427	2017	0	0	1	3	2	2	0	1	5	1	1	0	1	0	2
1428	2017	0	0	2	2	1	3	0	1	2	0	0	0	1	0	2
1429	2017	0	1	1	2	3	3	0	1	4	1	2	0	1	1	2
1430	2017	0	1	2	3	1	3	0	1	3	0	0	0	1	0	2
1431	2017	0	1	2	4	2	3	0	1	2	0	0	0	1	0	3
1432	2017	1	0	0	3	2	3	1	1	3	0	2	0	1	0	3
1433	2017	0	0	1	2	1	2	0	1	4	1	1	0	0	0	1
1434	2017	0	1	2	1	2	3	0	1	2	0	0	0	1	0	1
1435	2017	0	0	1	2	2	2	0	1	2	0	1	0	1	0	3
1436	2017	0	0	1	4	2	2	1	1	2	0	1	0	1	0	3
1437	2017	0	1	0	3	3	1	0	1	3	1	1	0	0	0	1
1438	2017	0	0	0	3	3	2	1	1	1	0	1	0	1	0	3
1439	2017	0	1	0	2	1	2	0	1	2	0	0	0	0	0	3
1440	2017	0	1	1	2	1	3	0	1	3	0	1	0	0	0	3
1441	2017	0	0	1	4	1	3	1	1	2	0	1	1	1	0	3
1442	2017	0	0	0	3	3	2	0	1	2	0	1	0	1	0	3
1443	2017	0	0	1	2	1	2	0	1	2	0	1	0	1	1	2
1444	2017	0	1	0	3	2	3	0	1	2	0	0	0	0	0	3
1445	2017	0	0	1	4	1	2	0	1	4	1	1	0	0	0	2
1446	2017	0	1	0	2	1	2	0	1	2	1	2	1	1	0	3
1447	2017	0	1	0	3	1	1	0	1	3	1	1	0	0	0	2
1448	2017	0	0	0	3	2	2	0	1	2	0	0	0	1	1	3
1449	2017	0	1	0	4	0	2	0	1	1	0	1	0	1	0	3
1450	2017	1	1	1	3	2	2	0	1	2	0	1	0	0	0	3
1451	2017	1	1	1	1	2	2	0	1	4	1	2	0	0	1	2
1452	2017	0	1	1	2	3	3	0	1	2	0	1	0	1	0	2
1453	2017	0	1	0	1	3	2	0	1	3	0	1	0	0	0	3
1454	2017	0	0	1	4	1	4	0	1	1	0	1	0	1	0	3
1455	2017	0	1	1	2	2	3	0	1	2	0	0	0	1	0	2
1456	2017	0	0	0	2	2	3	0	1	2	0	1	0	1	1	3
1457	2017	0	1	1	2	2	3	0	1	2	0	0	0	0	0	3
1458	2017	0	0	0	3	1	1	0	1	2	0	0	0	0	1	3
1459	2017	0	0	1	4	2	2	1	1	1	0	1	0	1	0	3
1460	2017	1	1	1	3	3	3	1	1	4	1	2	0	0	1	2
1461	2017	0	1	0	3	1	2	1	1	2	0	0	0	1	0	3
1462	2017	0	1	0	2	1	3	0	1	2	1	2	0	1	0	3
1463	2017	0	1	0	2	2	2	0	1	2	0	0	0	0	0	3
1464	2017	0	0	1	2	2	2	0	1	2	0	0	0	1	0	3
1465	2017	0	1	0	2	3	2	0	1	2	0	1	0	0	0	3
1466	2017	0	0	1	3	2	2	0	1	3	0	1	1	1	0	3
1467	2017	1	0	0	2	1	2	0	1	2	0	0	1	0	0	3
1468	2017	0	0	1	1	2	2	0	1	3	0	1	1	1	0	3
1469	2017	0	1	1	2	1	3	0	1	2	0	1	0	0	0	3
1470	2017	0	0	2	1	1	3	0	1	2	0	0	0	1	0	3
1471	2017	0	1	0	2	2	3	1	1	3	0	1	0	1	0	3
1472	2017	0	1	1	3	2	3	0	1	2	1	2	0	0	0	3
1473	2017	0	1	1	3	2	3	0	1	2	0	2	0	1	0	3
1474	2017	0	1	1	2	2	2	0	1	3	1	0	0	0	0	2
1475	2017	0	0	0	3	1	4	0	1	2	0	0	1	1	0	3
1476	2017	0	0	0	2	2	2	0	1	2	0	1	1	1	0	3
1477	2017	0	1	0	3	3	2	0	1	3	0	1	0	1	0	2
1478	2017	0	1	1	3	1	3	1	1	1	0	0	0	0	0	3
1479	2017	0	1	1	1	2	3	0	1	2	0	0	0	0	0	3
1480	2017	0	1	1	2	2	2	0	1	2	0	1	0	0	0	2
1481	2017	0	1	0	2	2	2	0	1	3	1	1	0	0	0	3
1482	2017	0	0	0	2	3	2	0	1	2	0	1	0	1	1	3
1483	2017	0	1	1	2	3	2	0	1	3	0	0	0	0	0	3
1484	2017	0	0	0	3	1	2	1	1	1	0	0	0	1	0	3
1485	2017	0	1	1	3	2	2	0	1	2	0	0	0	1	0	2
1486	2017	0	0	1	4	2	3	0	1	1	0	1	0	0	0	3
1487	2017	0	1	1	2	1	2	0	1	2	0	0	0	1	0	3
1488	2017	1	1	1	1	3	3	0	1	4	1	2	0	0	1	2
1489	2017	0	1	0	3	1	3	0	0	3	0	2	0	0	0	2
1490	2017	0	0	0	2	3	1	0	0	3	0	1	0	1	0	3
1491	2017	0	0	0	2	3	2	0	0	4	0	1	0	0	0	2
1492	2017	0	0	0	3	0	4	1	0	1	0	1	0	1	0	3
1493	2017	0	1	1	2	3	3	0	0	4	0	1	0	1	0	2
1494	2017	0	0	0	2	1	2	0	0	2	0	1	1	1	0	3
1495	2017	0	1	0	2	1	2	0	0	4	1	1	0	1	0	2
1496	2017	0	1	1	2	2	2	0	0	3	0	1	0	0	0	2
1497	2017	0	1	1	2	2	3	0	0	2	0	1	0	0	0	3
1498	2017	0	1	0	3	3	3	0	0	3	1	1	0	0	0	2
1499	2017	0	1	0	1	2	2	0	0	2	0	0	0	0	0	3
1500	2017	0	1	2	3	1	2	0	0	2	0	1	0	0	0	2
1501	2017	0	1	2	1	1	3	0	0	1	0	0	0	0	1	3
1502	2017	0	0	1	1	2	3	0	0	3	0	0	0	1	0	3
1503	2017	0	1	1	3	1	3	0	0	2	1	0	0	1	0	2
1504	2017	0	1	0	2	1	2	0	0	1	0	0	0	1	0	3
1505	2017	0	1	1	2	2	3	0	0	2	0	1	0	1	0	3
1506	2017	0	0	0	1	2	1	0	0	1	0	0	0	1	0	3
1507	2017	0	1	0	1	2	3	0	0	2	0	1	0	0	0	3
1508	2017	0	0	1	2	3	2	0	0	3	1	2	0	0	0	2
1509	2017	0	0	1	3	1	2	1	0	4	1	2	0	0	1	1
1510	2017	0	1	0	3	2	3	0	0	1	1	2	0	1	0	3
1511	2017	0	1	1	2	1	2	0	0	2	0	2	0	1	0	3
1512	2017	0	1	0	2	3	2	0	0	3	1	1	0	1	0	2
1513	2017	0	1	1	1	1	3	0	0	2	0	0	0	0	0	3
1514	2017	0	1	0	3	1	4	1	0	3	0	0	1	1	0	3
1515	2017	0	1	1	1	2	2	0	0	3	0	1	0	0	0	3
1516	2017	0	1	0	1	2	2	0	0	2	0	1	0	1	0	3
1517	2017	0	0	1	3	1	2	0	0	2	0	0	0	1	0	3
1518	2017	0	0	0	3	2	2	0	0	3	1	2	0	1	0	3
1519	2017	0	0	1	2	2	2	0	0	2	0	1	1	1	0	3
1520	2017	0	0	0	4	1	2	1	0	3	0	1	0	1	1	3
1521	2017	0	0	1	3	2	3	0	0	1	0	1	0	1	0	3
1522	2017	0	0	2	3	1	2	0	0	2	0	2	1	1	0	2
1523	2017	0	1	1	2	2	3	0	0	3	0	1	0	0	0	3
1524	2017	0	1	0	2	3	2	0	0	2	0	1	0	0	0	3
1525	2017	0	1	2	2	1	2	0	0	2	0	2	0	1	0	2
1526	2017	0	1	2	1	1	3	0	0	3	0	1	0	0	1	2
1527	2017	0	0	0	2	2	2	0	0	3	0	1	0	1	0	3
1528	2017	0	0	1	2	2	2	0	2	2	0	1	0	1	0	3
1529	2017	0	0	1	1	1	2	0	2	5	0	0	1	0	0	1
1530	2017	0	0	2	1	3	3	0	2	5	1	1	0	0	1	1
1531	2017	0	1	0	2	2	3	0	2	3	0	1	0	0	0	3
1532	2017	0	1	0	2	3	4	0	2	4	1	2	0	0	0	3
1533	2017	0	1	1	3	3	3	0	2	3	1	2	0	0	0	2
1534	2017	0	0	0	4	2	2	0	2	2	0	1	0	1	0	3
1535	2017	0	0	1	3	3	2	0	2	3	1	1	0	0	0	3
1536	2017	0	1	0	4	2	2	0	2	3	0	0	0	1	0	3
1537	2017	0	0	0	3	3	2	0	2	2	0	1	0	1	0	3
1538	2017	0	0	0	2	2	3	0	2	3	0	0	0	0	0	3
1539	2017	0	1	2	1	2	3	0	2	3	0	1	0	0	0	1
1540	2017	0	1	0	3	3	3	0	2	2	0	0	0	0	0	3
1541	2017	0	0	0	2	3	1	0	2	3	0	0	0	1	1	3
1542	2017	0	0	0	2	2	2	0	2	2	0	0	1	0	0	3
1543	2017	0	0	1	1	1	3	0	2	3	0	0	1	1	0	3
1544	2017	0	1	0	2	1	2	0	2	2	0	0	0	1	0	3
1545	2017	0	1	0	2	3	3	0	2	3	0	1	0	0	1	3
1546	2017	0	0	0	2	3	2	0	2	2	0	1	0	0	0	3
1547	2017	0	0	0	3	1	2	0	2	2	0	1	0	0	0	3
1548	2017	0	1	0	2	3	2	0	2	3	1	1	0	0	0	3
1549	2017	0	0	0	2	1	2	0	2	3	1	1	0	0	1	2
1550	2017	0	0	0	2	3	1	0	2	4	0	1	0	1	0	3
1551	2017	0	0	0	3	2	1	0	2	2	0	1	0	1	0	3
1552	2017	0	0	0	4	1	4	0	2	2	0	0	1	1	0	3
1553	2017	0	0	0	4	2	3	0	2	1	0	0	0	0	0	3
1554	2017	0	0	0	3	2	2	0	2	4	1	2	0	0	0	2
1555	2017	0	1	1	1	2	3	0	2	2	1	2	0	0	0	3
1556	2017	0	1	0	2	1	2	0	2	3	1	2	0	0	0	3
1557	2017	0	0	1	1	2	3	0	2	4	1	1	0	0	0	1
1558	2017	0	0	1	4	1	3	0	2	3	0	1	0	1	0	3
1559	2017	0	1	0	3	2	3	0	2	3	0	1	1	0	0	3
1560	2017	0	1	0	4	2	2	0	2	2	0	0	0	1	0	3
1561	2017	0	0	0	4	3	2	0	2	2	0	1	0	1	0	3
1562	2017	0	0	1	4	2	2	0	2	2	0	1	0	0	0	3
1563	2017	0	1	1	1	1	2	0	2	3	0	2	0	0	0	2
1564	2017	0	1	1	3	1	2	0	2	2	1	2	0	0	0	3
1565	2017	0	0	1	3	2	2	0	2	3	1	2	0	1	0	2
1566	2017	0	0	0	2	2	2	0	2	2	1	1	0	1	0	3
1567	2017	0	1	0	3	3	2	0	2	3	0	1	0	0	0	3
1568	2017	0	1	0	2	2	3	0	2	2	0	1	0	1	0	3
1569	2017	0	0	2	3	2	3	0	2	2	0	0	0	1	0	3
1570	2017	0	0	0	3	2	3	0	2	3	0	1	0	1	1	3
1571	2017	0	1	2	2	2	3	0	2	4	1	2	0	1	0	2
1572	2017	0	0	2	3	2	1	0	2	2	0	1	0	0	0	3
1573	2017	0	0	0	3	1	2	0	2	2	0	1	0	1	0	3
1574	2017	0	1	1	3	3	2	0	2	3	0	1	0	0	0	2
1575	2017	0	1	1	2	2	3	0	2	3	1	1	0	0	1	2
1576	2017	0	0	0	2	3	2	0	2	2	0	2	1	1	0	3
1577	2017	0	0	1	1	2	2	0	2	4	1	2	0	0	1	2
1578	2017	0	1	0	1	3	3	0	2	3	1	2	0	0	0	2
1579	2017	0	1	0	1	2	1	0	2	3	1	2	0	0	0	2
1580	2017	0	0	0	2	2	2	0	2	4	1	2	0	1	0	2
1581	2017	0	1	1	3	0	3	0	2	4	1	2	0	0	0	3
1582	2017	0	0	1	3	2	4	0	2	2	0	1	0	1	0	3
1583	2017	0	1	0	2	1	2	0	2	3	0	1	0	1	0	3
1584	2017	0	1	0	3	3	3	0	2	2	0	2	0	1	0	3
1585	2017	0	1	0	2	2	3	0	2	4	0	1	0	0	1	2
1586	2017	0	0	1	2	1	2	0	2	3	0	1	0	0	0	2
1587	2017	0	0	0	4	2	2	0	2	3	1	1	0	0	1	2
1588	2017	0	1	0	2	2	3	0	2	3	0	0	0	0	0	1
1589	2017	0	1	1	2	2	2	0	1	3	1	2	0	0	1	3
1590	2017	0	0	1	2	2	3	0	1	3	1	2	0	0	0	2
1591	2017	0	0	0	2	3	2	0	1	4	0	1	0	1	0	3
1592	2017	0	1	2	1	3	3	0	1	4	1	2	0	0	1	1
1593	2017	0	0	1	2	1	2	0	1	3	1	2	0	0	1	2
1594	2017	0	1	1	3	1	4	0	1	2	0	1	1	0	0	3
1595	2017	0	1	0	4	1	3	0	1	2	1	1	0	1	0	3
1596	2017	0	0	1	3	2	2	0	1	2	0	1	0	1	0	3
1597	2017	0	0	0	2	1	2	0	1	2	0	1	0	1	0	3
1598	2017	0	0	1	2	1	1	0	1	3	0	1	1	0	0	2
1599	2017	0	1	1	2	1	3	0	1	2	0	1	0	0	0	3
1600	2017	0	1	0	2	2	2	0	1	2	0	0	0	0	0	3
1601	2017	0	0	2	1	2	3	0	1	2	1	1	1	0	0	1
1602	2017	0	1	0	2	1	3	0	1	2	0	1	0	1	0	3
1603	2017	0	0	1	2	2	2	0	1	2	0	1	0	0	0	3
1604	2017	0	0	1	2	2	2	0	1	3	0	1	0	1	0	3
1605	2017	0	1	1	2	1	3	0	1	2	0	0	0	0	1	2
1606	2017	0	0	1	1	2	2	0	1	3	0	1	0	0	0	3
1607	2017	0	0	0	3	1	2	0	1	1	0	1	0	1	0	3
1608	2017	0	1	2	1	1	3	0	1	3	0	1	0	0	0	1
1609	2017	0	1	0	3	1	2	0	1	2	0	1	1	1	0	3
1610	2017	0	1	1	3	3	4	1	1	2	0	0	0	1	0	3
1611	2017	0	1	0	3	1	4	1	1	2	0	0	0	1	0	3
1612	2017	0	0	1	1	3	2	0	1	4	1	2	0	0	0	2
1613	2017	0	0	1	1	3	2	0	1	4	1	2	0	0	0	1
1614	2017	0	1	0	1	1	3	0	1	1	0	0	0	1	0	3
1615	2017	0	0	1	1	2	2	0	1	5	1	1	0	0	1	1
1616	2017	0	0	1	2	1	3	0	1	3	0	1	0	0	0	3
1617	2017	0	1	0	3	2	2	1	1	2	0	1	0	0	1	3
1618	2017	0	0	1	2	2	3	0	1	2	0	0	0	1	0	3
1619	2017	1	1	0	1	3	3	0	1	4	1	1	0	0	1	2
1620	2017	0	0	0	3	1	2	0	1	3	0	0	1	1	0	3
1621	2017	0	1	0	2	2	2	1	1	2	0	1	0	1	0	3
1622	2017	0	0	1	2	2	4	0	1	2	0	1	1	1	0	3
1623	2017	0	0	2	2	1	2	0	1	3	0	0	0	0	0	2
1624	2017	0	0	1	3	2	2	0	1	2	1	1	1	1	0	3
1625	2017	0	0	0	3	3	2	1	1	2	0	1	0	1	0	3
1626	2017	0	0	1	2	1	2	0	1	2	0	1	0	0	0	3
1627	2017	0	0	0	1	2	1	0	1	3	0	0	0	0	0	2
1628	2017	0	0	0	2	1	2	0	1	2	0	0	0	1	0	3
1629	2017	0	0	1	1	2	2	0	1	3	0	1	0	1	0	3
1630	2017	0	1	0	1	3	2	0	1	4	1	1	0	0	1	2
1631	2017	0	0	1	1	2	3	0	1	3	0	1	0	0	0	2
1632	2017	0	1	0	2	3	3	0	1	5	1	2	0	0	0	1
1633	2017	0	0	1	1	2	2	0	1	3	0	1	0	1	0	3
1634	2017	0	1	2	1	2	3	0	1	3	0	1	0	1	0	2
1635	2017	0	0	0	3	2	1	0	1	2	0	1	0	1	0	3
1636	2017	0	0	1	2	2	2	0	1	2	0	1	0	0	0	3
1637	2017	1	1	1	1	2	3	0	1	4	0	1	0	0	0	2
1638	2017	0	1	1	2	2	3	0	1	2	0	0	0	0	0	3
1639	2017	0	0	0	2	3	2	0	1	4	0	1	0	0	0	1
1640	2017	0	1	1	3	3	1	1	1	2	0	0	0	0	0	3
1641	2017	0	1	0	1	3	3	0	0	2	0	1	0	0	1	3
1642	2017	0	0	0	2	2	2	0	0	2	0	0	0	0	0	2
1643	2017	0	0	0	2	2	2	0	0	2	0	1	0	1	0	3
1644	2017	0	1	1	3	1	3	0	2	3	0	0	0	0	0	2
1645	2017	0	1	0	3	2	2	0	2	2	1	1	0	1	0	2
1646	2017	0	0	0	2	3	2	0	2	2	0	1	0	1	1	3
1647	2017	0	1	1	4	3	2	0	2	2	0	1	0	0	0	2
1648	2017	0	1	2	1	3	3	0	2	4	1	2	0	1	0	1
1649	2017	0	1	2	1	2	3	0	2	3	0	0	0	1	0	3
1650	2017	0	1	1	1	2	3	0	2	4	1	2	0	0	0	2
1651	2017	0	1	0	3	2	2	0	2	3	1	2	0	1	0	1
1652	2017	0	0	0	3	1	4	1	2	1	0	1	0	0	0	3
1653	2017	0	1	1	3	1	3	0	2	2	0	1	0	0	0	3
1654	2017	0	1	1	2	1	3	0	2	3	0	1	0	1	0	2
1655	2017	0	0	0	3	3	2	0	2	3	1	1	0	0	0	2
1656	2017	0	1	0	1	3	3	0	2	3	0	0	0	0	0	2
1657	2017	0	1	1	2	3	3	0	2	3	0	1	0	1	0	3
1658	2017	0	1	1	2	1	2	0	2	2	0	0	0	1	0	3
1659	2017	0	1	0	1	1	2	0	2	2	0	1	0	0	0	3
1660	2017	0	1	2	2	3	3	0	2	2	0	1	0	0	0	3
1661	2017	1	0	0	2	2	2	0	2	5	1	2	0	0	1	2
1662	2017	0	0	0	4	2	2	0	2	1	0	0	0	1	0	3
1663	2017	0	0	1	4	1	2	0	2	2	0	0	0	0	0	3
1664	2017	0	1	2	2	0	3	0	2	3	0	2	0	0	0	2
1665	2017	0	1	2	3	1	3	0	2	1	0	0	1	1	0	3
1666	2017	0	0	1	4	3	3	0	2	2	0	1	0	0	1	1
1667	2017	0	1	0	4	1	1	0	2	3	1	0	1	1	0	2
1668	2017	0	0	1	3	2	2	0	2	1	0	1	0	1	0	3
1669	2017	0	0	0	4	2	4	0	2	2	0	1	1	1	0	2
1670	2017	0	1	1	3	1	3	0	2	2	1	1	0	1	0	3
1671	2017	0	0	1	3	2	2	0	2	3	0	1	1	0	1	2
1672	2017	0	0	0	4	2	2	0	2	2	0	1	0	1	0	3
1673	2017	0	0	2	3	2	3	0	2	5	1	2	1	0	1	1
1674	2017	0	1	0	1	2	2	0	2	2	0	0	0	0	1	3
1675	2017	0	1	0	3	1	3	0	2	2	0	0	0	0	0	3
1676	2017	0	1	2	3	1	3	0	2	2	0	1	0	1	0	3
1677	2017	0	0	1	4	2	2	0	2	3	0	2	0	1	0	3
1678	2017	0	1	1	2	1	3	0	2	3	1	2	0	0	0	3
1679	2017	0	1	1	3	1	2	0	2	1	0	1	0	1	0	3
1680	2017	0	1	1	2	2	2	0	2	3	1	1	0	0	0	2
1681	2017	0	1	0	1	2	2	0	2	2	0	1	0	1	0	2
1682	2017	0	1	0	1	3	4	0	2	3	0	0	0	0	0	2
1683	2017	0	0	0	3	2	2	0	2	3	0	0	0	1	0	2
1684	2017	0	0	0	3	1	2	0	2	2	0	0	1	1	0	3
1685	2017	0	1	0	2	1	3	0	2	2	0	0	1	0	0	3
1686	2017	0	1	1	1	2	2	0	2	3	1	2	0	0	0	2
1687	2017	0	0	1	2	2	2	0	2	3	1	1	0	1	1	2
1688	2017	0	0	2	2	2	2	0	2	3	0	1	0	1	0	2
1689	2017	0	0	0	2	3	2	0	2	2	0	1	0	1	0	3
1690	2017	0	0	0	1	3	2	0	2	3	0	2	0	1	0	2
1691	2017	0	1	1	1	2	1	0	2	4	0	0	0	0	0	2
1692	2017	0	1	0	1	2	2	0	2	3	1	1	0	0	0	3
1693	2017	0	1	1	1	3	3	0	2	3	0	1	0	0	0	2
1694	2017	0	0	2	1	1	3	0	2	4	0	1	0	0	0	1
1695	2017	0	1	1	3	2	3	0	2	1	0	0	0	0	0	3
1696	2017	0	1	1	2	3	2	0	2	5	1	2	0	0	1	1
1697	2017	0	1	0	3	3	2	0	1	3	0	0	0	0	0	2
1698	2017	0	0	0	2	1	2	0	1	3	0	0	0	0	0	2
1699	2017	0	0	0	3	3	2	0	1	5	1	2	0	0	0	1
1700	2017	0	1	1	2	2	3	1	1	3	1	1	0	1	0	2
1701	2017	0	0	0	3	2	2	1	1	3	0	2	0	0	0	3
1702	2017	0	1	1	1	1	3	0	1	3	1	1	0	0	0	2
1703	2017	0	1	1	1	2	3	0	1	4	1	1	0	0	1	2
1704	2017	0	1	0	3	1	3	1	1	3	0	1	1	1	0	3
1705	2017	0	0	0	3	1	2	0	1	2	0	0	1	1	0	3
1706	2017	0	1	2	1	3	3	0	1	2	1	1	0	0	0	2
1707	2017	0	1	1	2	3	3	0	1	3	1	1	0	0	1	2
1708	2017	0	0	1	2	3	3	0	1	3	0	1	0	1	0	3
1709	2017	0	1	0	2	2	2	0	1	2	0	1	0	0	0	2
1710	2017	0	1	2	1	1	3	0	1	3	1	1	0	1	0	2
1711	2017	0	1	1	1	3	2	0	1	4	1	2	0	1	1	2
1712	2017	0	1	0	3	1	3	0	1	3	0	2	0	0	0	2
1713	2017	0	0	0	1	1	3	0	1	2	0	0	1	1	0	3
1714	2017	0	1	0	1	1	2	0	1	3	0	1	0	1	0	3
1715	2017	0	0	0	2	2	2	0	1	2	0	1	0	0	0	3
1716	2017	0	0	1	1	3	2	0	1	3	1	1	0	0	0	2
1717	2017	0	0	0	1	1	2	0	1	2	0	0	0	1	0	3
1718	2017	0	1	0	2	2	3	0	1	4	1	2	0	0	0	2
1719	2017	0	0	0	3	3	2	0	1	2	0	0	0	1	0	3
1720	2017	1	1	1	2	1	3	0	1	4	1	2	0	0	0	1
1721	2017	0	1	0	4	3	2	0	1	1	0	2	0	0	0	3
1722	2017	0	0	1	1	2	2	0	1	3	0	1	0	0	0	2
1723	2017	0	1	0	1	2	2	0	1	4	0	1	0	1	0	2
1724	2017	1	0	1	1	3	3	0	1	3	0	1	0	1	0	2
1725	2017	0	0	0	2	2	3	0	1	2	0	0	0	1	0	3
1726	2017	0	1	1	1	3	3	0	1	2	0	0	0	0	1	3
1727	2017	0	1	2	4	1	3	0	1	3	0	0	0	0	0	2
1728	2017	0	1	0	3	1	2	0	1	1	0	0	0	1	0	3
1729	2017	0	1	1	1	1	1	0	1	3	0	1	0	0	0	2
1730	2017	0	0	0	3	1	2	0	1	3	0	1	0	1	0	3
1731	2017	0	0	0	1	1	2	0	1	3	1	2	1	1	0	3
1732	2017	0	0	0	3	2	2	0	1	3	0	1	0	1	0	2
1733	2017	0	0	0	3	2	1	0	1	3	0	0	0	0	0	2
1734	2017	0	0	1	1	3	2	0	1	3	1	2	0	0	0	2
1735	2017	0	1	0	2	3	2	0	1	4	1	2	1	1	0	1
1736	2017	0	1	2	1	2	2	0	1	3	0	1	0	0	0	2
1737	2017	0	1	1	1	2	4	0	0	3	1	2	0	0	0	2
1738	2017	0	1	0	2	3	3	0	0	4	1	2	0	0	0	2
1739	2017	0	0	0	1	2	2	0	0	3	0	1	0	0	0	2
1740	2017	0	1	0	1	2	3	0	0	3	0	1	1	1	1	3
1741	2017	0	1	0	2	1	2	0	0	3	0	1	0	0	0	3
1742	2017	0	0	1	1	3	2	0	0	3	0	1	1	1	0	2
1743	2017	1	0	1	3	2	4	0	0	3	0	1	0	0	1	1
1744	2017	0	0	0	3	3	2	0	0	3	1	2	0	1	0	3
1745	2017	1	1	0	3	1	3	0	0	5	1	1	0	0	0	2
1746	2017	0	1	1	2	2	3	0	0	3	0	1	0	0	0	3
1747	2017	0	0	0	3	2	2	0	0	2	0	0	0	1	0	3
1748	2017	0	1	1	1	2	2	0	0	3	0	1	0	0	1	2
1749	2017	0	1	1	2	2	2	0	0	3	0	1	1	1	0	3
1750	2017	0	0	2	2	1	2	0	0	2	0	0	0	1	0	3
1751	2017	0	1	0	4	2	2	0	0	4	0	0	0	0	0	1
1752	2017	0	0	1	3	2	2	1	0	3	0	0	0	1	0	2
1753	2017	0	0	0	2	1	3	0	2	1	0	0	0	1	0	3
1754	2017	0	0	2	2	1	4	1	2	1	0	1	0	1	0	3
1755	2017	0	0	1	3	2	2	0	2	2	0	2	0	1	0	3
1756	2017	0	0	1	2	1	2	0	2	3	0	1	0	1	0	2
1757	2017	0	0	1	2	2	2	0	2	2	0	0	0	1	1	3
1758	2017	0	0	0	2	2	2	0	2	2	0	2	0	1	0	3
1759	2017	0	0	0	2	3	2	0	2	2	0	1	0	1	0	3
1760	2017	0	1	1	2	1	3	0	2	4	0	1	0	0	1	1
1761	2017	0	0	1	2	3	2	0	2	2	0	1	0	1	0	3
1762	2017	0	0	0	2	2	2	0	2	5	1	2	0	0	1	1
1763	2017	0	1	0	2	3	2	0	2	2	1	2	0	1	1	3
1764	2017	0	0	0	3	1	2	0	2	3	0	1	0	1	1	3
1765	2017	0	0	1	3	2	2	0	2	2	0	1	0	1	0	3
1766	2017	0	1	0	4	2	3	0	2	1	0	1	0	1	0	3
1767	2017	0	0	2	4	2	2	0	2	3	0	1	0	1	0	3
1768	2017	0	1	0	3	1	2	0	2	3	0	0	0	1	1	2
1769	2017	0	0	0	4	1	2	0	2	3	0	1	0	1	0	3
1770	2017	0	1	2	2	1	3	0	2	2	0	0	0	0	1	3
1771	2017	0	0	0	3	2	2	0	2	2	0	1	0	1	0	3
1772	2017	0	1	0	2	2	2	0	2	2	0	2	0	0	0	3
1773	2017	0	1	0	2	1	2	0	2	3	0	0	0	1	0	2
1774	2017	0	0	0	2	1	2	0	2	2	0	2	1	1	0	3
1775	2017	0	1	2	2	1	2	0	2	5	0	1	0	0	0	1
1776	2017	0	1	0	2	2	2	0	2	3	0	1	0	0	0	2
1777	2017	0	0	0	2	1	2	0	2	2	0	1	0	1	0	3
1778	2017	0	0	1	3	1	3	0	2	2	0	1	0	1	0	3
1779	2017	0	0	0	3	3	2	0	2	3	0	1	0	1	0	3
1780	2017	0	0	0	3	2	4	0	2	4	0	2	0	1	1	3
1781	2017	0	1	2	2	1	2	0	2	2	0	2	0	0	0	3
1782	2017	0	1	0	3	1	1	0	2	3	0	1	0	1	0	3
1783	2017	0	1	1	2	2	2	0	2	1	0	1	0	1	0	3
1784	2017	0	1	1	2	2	3	0	2	2	1	1	0	0	0	2
1785	2017	0	1	0	3	1	2	0	2	3	0	1	1	1	0	2
1786	2017	0	0	1	3	3	2	0	2	4	0	0	0	0	0	2
1787	2017	0	1	1	3	1	2	0	2	3	0	1	0	1	0	3
1788	2017	0	1	0	3	2	3	0	2	3	0	1	0	1	0	2
1789	2017	0	0	2	2	2	2	0	2	3	0	1	0	1	0	2
1790	2017	0	1	0	4	1	3	0	2	1	0	0	0	1	0	3
1791	2017	0	0	0	3	3	2	0	2	2	0	1	0	1	0	3
1792	2017	0	0	1	4	2	2	0	2	2	0	0	0	1	0	3
1793	2017	0	1	2	2	2	3	0	2	3	1	2	0	1	0	2
1794	2017	0	1	1	2	2	3	0	2	2	0	1	0	0	0	3
1795	2017	0	0	0	2	2	3	0	2	2	0	0	0	1	0	3
1796	2017	0	0	0	3	2	2	0	2	2	1	1	0	1	0	3
1797	2017	0	1	1	2	2	2	0	2	5	0	0	0	0	1	1
1798	2017	0	1	0	2	3	2	0	2	2	0	0	0	1	0	3
1799	2017	0	0	1	2	1	2	0	2	5	0	1	0	1	1	3
1800	2017	0	1	0	3	3	2	0	2	2	0	0	0	1	1	3
1801	2017	0	1	2	2	1	3	0	2	2	0	1	0	0	0	3
1802	2017	0	1	0	3	2	3	0	2	2	0	1	1	0	0	3
1803	2017	0	0	1	2	2	3	0	2	3	0	0	0	1	0	2
1804	2017	0	0	0	2	1	1	0	2	1	0	0	1	1	0	3
1805	2017	0	1	1	3	1	3	0	2	3	0	0	0	0	0	2
1806	2017	0	0	0	4	1	2	0	2	2	0	1	0	1	0	3
1807	2017	0	1	1	2	1	3	0	2	2	0	1	1	1	0	3
1808	2017	0	1	0	2	2	4	0	2	1	0	1	0	1	0	3
1809	2017	0	0	1	2	1	1	0	2	2	0	1	0	1	0	3
1810	2017	0	1	0	3	2	4	0	2	1	0	0	0	1	0	3
1811	2017	0	1	0	2	2	2	0	2	2	0	1	0	1	0	3
1812	2017	0	0	0	2	1	2	0	2	4	0	1	0	1	1	2
1813	2017	0	1	1	2	1	3	0	2	4	0	1	0	1	0	2
1814	2017	0	1	2	3	1	3	0	2	3	0	1	0	0	1	2
1815	2017	0	1	1	2	1	3	0	2	1	0	0	0	1	1	3
1816	2017	0	0	0	2	1	2	0	2	4	0	1	0	0	1	2
1817	2017	0	1	0	4	2	3	0	2	1	0	1	0	1	0	3
1818	2017	0	1	0	2	1	3	0	2	1	0	0	0	1	0	3
1819	2017	0	1	2	2	1	3	0	2	3	0	1	0	0	0	1
1820	2017	0	1	2	2	2	3	0	2	4	1	2	0	0	1	2
1821	2017	0	0	1	3	2	2	0	2	1	0	0	0	1	0	3
1822	2017	0	1	2	2	1	3	0	2	4	0	1	0	0	0	2
1823	2017	0	1	0	2	1	2	0	1	2	0	1	1	1	0	3
1824	2017	0	1	0	4	1	2	0	1	2	0	0	0	1	0	3
1825	2017	0	0	0	2	1	2	0	1	2	0	0	0	1	0	2
1826	2017	0	0	0	3	3	3	0	1	2	0	0	1	1	0	3
1827	2017	0	1	1	4	1	3	0	1	3	0	2	0	1	0	2
1828	2017	0	0	0	3	3	2	0	1	2	0	1	0	1	0	3
1829	2017	0	1	0	2	3	4	0	1	3	1	1	0	1	1	3
1830	2017	0	0	1	2	1	2	0	1	3	0	1	0	1	1	3
1831	2017	0	1	0	2	2	3	0	1	1	0	0	0	1	0	3
1832	2017	0	1	0	2	1	2	0	1	3	0	1	0	1	0	3
1833	2017	0	1	2	2	1	3	0	1	4	1	2	0	0	0	2
1834	2017	0	1	0	2	2	2	0	1	2	0	1	0	1	0	3
1835	2017	0	1	2	2	3	3	0	1	2	0	1	0	0	0	3
1836	2017	0	1	2	2	1	3	0	1	2	0	2	0	1	0	3
1837	2017	0	0	0	2	2	2	0	1	1	0	1	0	1	0	3
1838	2017	0	0	0	2	2	2	0	1	2	0	1	0	1	0	3
1839	2017	0	0	0	4	2	2	0	1	1	0	1	0	1	0	3
1840	2017	0	0	0	2	3	2	0	1	2	0	1	0	1	0	3
1841	2017	0	1	0	2	3	2	0	1	3	0	1	0	1	0	3
1842	2017	0	0	1	2	1	3	0	1	4	1	2	0	1	0	1
1843	2017	0	1	0	2	2	2	0	1	2	0	2	0	0	0	3
1844	2017	0	1	1	2	1	2	0	1	3	1	2	0	1	0	2
1845	2017	0	1	1	2	1	2	0	1	3	0	1	0	0	0	2
1846	2017	0	0	0	2	2	2	0	1	2	0	1	0	0	0	3
1847	2017	0	1	0	2	3	3	0	1	2	0	0	0	0	0	3
1848	2017	0	0	1	2	2	2	0	1	1	0	0	0	1	0	3
1849	2017	0	1	1	2	1	3	0	1	3	0	0	0	0	0	3
1850	2017	0	1	0	1	2	3	0	1	2	0	1	0	0	0	3
1851	2017	0	1	2	2	1	3	0	1	3	1	2	0	1	0	3
1852	2017	0	0	0	3	2	2	0	1	2	0	1	0	1	0	3
1853	2017	0	1	0	3	2	3	0	1	2	0	1	1	1	0	3
1854	2017	0	0	0	3	3	2	0	1	3	0	1	1	1	1	2
1855	2017	0	1	1	2	2	3	0	1	3	0	1	0	1	0	3
1856	2017	0	1	2	3	2	2	0	1	4	0	1	0	1	0	2
1857	2017	0	1	1	2	2	2	0	1	1	0	1	0	0	0	3
1858	2017	0	0	0	2	2	2	0	1	3	1	1	0	1	1	3
1859	2017	0	1	0	3	1	1	0	1	1	0	1	0	1	0	3
1860	2017	0	0	1	2	3	2	0	1	2	0	1	0	1	0	3
1861	2017	0	0	0	2	2	1	0	1	3	0	0	0	1	1	2
1862	2017	0	0	0	2	3	2	0	1	4	0	1	0	1	0	3
1863	2017	0	0	1	3	2	2	0	1	3	0	1	0	1	0	3
1864	2017	0	0	2	2	2	2	0	1	2	0	0	0	1	0	3
1865	2017	0	1	1	2	2	3	0	1	3	0	1	0	0	0	3
1866	2017	0	0	0	2	3	3	0	1	1	0	1	0	1	0	3
1867	2017	0	0	1	2	2	3	0	1	2	0	0	0	1	0	3
1868	2017	0	0	1	2	2	2	0	1	2	0	1	1	1	1	3
1869	2017	0	1	0	2	2	2	0	1	2	0	0	0	1	0	3
1870	2017	0	1	0	2	3	3	0	1	3	0	1	0	0	1	2
1871	2017	1	1	1	2	1	2	0	1	3	1	1	0	0	0	1
1872	2017	0	1	0	1	2	3	0	1	3	0	1	0	0	0	3
1873	2017	0	1	2	2	2	3	0	1	2	0	1	0	1	0	3
1874	2017	0	0	0	2	2	2	0	1	2	0	1	0	1	0	3
1875	2017	0	0	0	2	3	2	0	1	3	0	2	0	1	0	2
1876	2017	0	1	0	2	2	2	0	1	2	0	2	0	1	0	3
1877	2017	0	0	0	2	1	2	0	1	2	0	0	0	1	0	3
1878	2017	0	0	0	2	1	2	0	1	1	0	1	0	1	0	3
1879	2017	0	1	2	2	3	3	0	1	2	0	0	0	0	0	1
1880	2017	0	1	0	2	1	3	0	1	3	0	0	0	1	0	3
1881	2017	0	1	2	2	3	3	0	1	2	0	1	0	1	0	3
1882	2017	0	1	0	2	3	2	0	1	4	1	2	0	1	0	2
1883	2017	0	0	2	2	2	3	0	1	5	1	2	0	1	1	1
1884	2017	0	0	1	2	2	2	0	0	3	0	1	0	1	0	2
1885	2017	0	1	0	2	2	3	0	0	2	0	1	0	1	0	3
1886	2017	0	0	1	2	2	2	0	0	3	0	1	0	1	0	2
1887	2017	0	1	1	2	2	2	0	0	5	1	1	0	1	1	3
1888	2017	0	1	1	2	3	3	0	0	3	1	2	0	0	0	2
1889	2017	0	0	0	2	3	2	0	0	2	0	0	0	1	0	3
1890	2017	0	1	0	3	1	4	0	0	3	0	1	0	1	1	3
1891	2017	0	0	0	2	3	3	0	0	2	0	1	0	1	0	3
1892	2017	0	1	1	2	2	3	0	0	2	0	2	0	0	0	2
1893	2017	0	0	0	2	2	2	0	0	2	0	1	0	1	0	3
1894	2017	0	0	1	2	2	2	0	0	3	0	0	0	1	1	2
1895	2017	0	1	0	3	3	2	0	0	3	0	1	0	1	1	3
1896	2017	0	0	0	3	2	1	0	0	1	0	0	0	1	0	3
1897	2017	0	1	0	2	2	3	0	0	2	0	1	0	1	1	3
1898	2017	0	1	0	3	1	1	0	0	3	0	0	0	0	0	3
1899	2017	0	1	0	2	1	3	0	0	4	0	0	0	0	0	2
1900	2017	0	1	0	2	3	2	0	0	2	0	1	0	0	0	3
1901	2017	0	1	1	2	2	2	0	0	3	0	1	0	1	0	3
1902	2017	0	1	2	2	2	2	0	0	4	0	0	0	0	0	1
1903	2017	0	1	0	2	2	3	0	0	2	0	1	0	1	0	3
1904	2017	0	1	0	2	3	2	0	0	2	0	1	0	1	0	3
1905	2017	0	0	1	2	2	1	0	0	4	0	2	0	1	0	3
1906	2017	0	1	2	2	1	3	0	0	4	0	1	0	0	1	1
1907	2017	0	0	0	2	1	2	0	0	4	0	1	0	1	0	2
1908	2017	0	1	0	4	2	2	0	0	1	0	1	0	1	0	3
1909	2017	0	1	1	2	3	3	0	0	3	0	1	0	0	0	3
1910	2017	0	0	0	2	2	1	0	0	5	0	2	0	1	0	1
1911	2017	0	0	1	2	2	2	0	0	1	0	0	0	1	0	3
1912	2017	0	0	1	2	2	2	0	0	3	0	1	0	1	0	2
1913	2017	0	1	1	2	1	3	0	0	2	0	1	1	1	0	3
1914	2017	0	0	0	2	3	2	0	0	2	0	1	0	1	1	3
1915	2017	0	1	1	2	2	2	0	0	3	0	2	0	0	1	2
1916	2017	0	1	1	2	1	3	0	0	2	0	0	0	0	0	3
1917	2017	0	1	2	2	1	3	0	0	3	0	1	0	0	0	2
1918	2017	1	1	2	2	2	3	0	0	2	1	2	0	0	0	2
1919	2017	0	0	0	2	2	2	0	0	2	0	1	0	1	1	3
1920	2017	0	0	0	2	2	2	0	0	2	0	2	1	1	0	3
1921	2017	0	1	2	2	3	3	0	0	3	0	1	0	0	0	1
1922	2017	0	1	0	2	2	3	0	0	1	0	1	0	0	0	3
1923	2017	0	1	0	2	3	3	0	0	2	0	1	0	0	0	3
1924	2017	0	0	0	3	2	2	0	0	3	0	1	0	1	0	3
1925	2017	0	1	2	2	2	3	0	0	2	0	1	0	0	0	3
1926	2017	0	1	1	2	1	3	0	0	2	0	0	0	0	0	2
1927	2017	0	1	2	2	2	3	0	0	3	1	1	0	0	0	1
1928	2017	0	1	0	4	2	2	0	0	1	0	1	0	1	0	3
1929	2017	0	1	0	2	2	2	0	0	4	0	1	0	0	0	3
1930	2017	0	1	2	2	3	3	0	0	3	0	1	0	0	1	3
1931	2017	0	1	1	2	1	3	0	0	2	1	1	0	0	0	3
1932	2017	0	0	0	2	2	1	0	0	1	0	1	0	1	0	3
1933	2017	0	1	1	2	3	3	0	0	4	1	1	0	0	0	2
1934	2017	0	1	0	3	2	3	0	0	1	0	0	0	0	0	3
1935	2017	0	1	1	2	3	3	0	0	3	0	1	0	0	0	2
1936	2017	0	1	1	2	3	3	0	0	4	1	2	0	0	0	1
1937	2017	0	0	0	2	2	2	0	0	2	0	1	0	1	0	3
1938	2017	0	1	1	2	1	2	0	0	3	0	0	0	1	0	2
1939	2017	0	1	2	2	2	3	0	0	2	0	1	0	1	0	2
1940	2017	0	0	1	2	2	3	0	0	1	0	1	0	0	0	3
1941	2017	0	1	0	2	1	2	0	0	1	0	1	0	1	0	3
1942	2017	0	1	0	2	3	2	0	0	2	0	1	0	0	0	3
1943	2017	0	0	2	2	1	2	0	0	2	0	1	1	1	0	2
1944	2017	0	0	0	3	2	2	0	0	3	0	2	1	1	1	3
1945	2017	0	0	0	3	2	1	0	0	3	0	0	0	1	0	3
1946	2017	0	0	1	2	3	2	0	0	4	0	0	0	0	1	2
1947	2017	0	1	1	2	2	3	0	0	4	0	1	0	0	1	2
1948	2017	0	1	0	3	2	1	0	0	2	0	1	1	1	0	3
1949	2017	0	1	0	2	2	2	0	0	2	1	2	0	1	0	3
1950	2017	0	0	0	2	2	2	0	0	2	0	1	0	1	0	3
1951	2017	0	0	0	2	2	2	0	0	2	0	1	0	1	0	3
1952	2017	0	0	2	2	1	1	0	0	2	0	0	0	1	0	3
1953	2017	0	0	0	2	3	2	0	0	3	1	1	0	1	0	3
1954	2017	0	0	2	4	1	2	0	0	2	0	0	1	1	0	3
1955	2017	0	1	1	2	3	2	0	0	2	0	0	0	0	0	3
1956	2017	0	0	0	3	1	2	0	0	1	0	0	0	1	0	3
1957	2017	0	1	0	4	1	3	0	0	1	0	0	0	1	1	3
1958	2017	1	0	1	4	3	2	0	2	5	1	2	0	1	1	1
1959	2017	0	1	1	2	2	3	0	2	3	0	0	0	0	0	2
1960	2017	0	1	1	1	3	3	0	2	2	1	1	0	1	0	3
1961	2017	0	1	0	2	2	2	0	2	2	0	1	0	0	0	2
1962	2017	0	0	0	1	3	2	0	0	1	0	0	0	0	0	3
1963	2017	0	0	0	3	3	2	0	0	1	0	1	0	1	0	3
1964	2017	0	1	0	4	2	2	0	0	2	1	2	0	0	0	2
1965	2017	0	0	2	1	1	3	0	0	2	0	0	0	1	0	2
1966	2017	0	0	0	2	2	1	0	0	2	0	1	1	1	0	3
1967	2017	0	0	1	1	2	2	0	0	3	0	0	0	0	0	2
1968	2017	0	0	1	1	2	2	0	0	2	0	0	0	1	0	2
1969	2017	0	0	1	2	3	2	0	0	3	0	1	0	1	0	2
1970	2017	0	0	0	2	2	3	0	0	3	0	1	0	0	0	3
1971	2017	0	1	1	2	3	3	0	0	3	0	1	0	0	0	3
1972	2017	0	1	1	1	2	3	0	0	2	0	1	0	0	0	2
1973	2017	0	1	2	1	1	3	0	0	2	0	0	0	0	0	1
1974	2017	0	0	0	2	2	1	0	0	3	1	2	0	0	0	1
1975	2017	0	1	2	3	1	3	0	0	2	1	1	0	0	0	3
1976	2017	0	0	0	2	2	2	0	2	3	0	2	0	1	0	3
1977	2017	0	1	2	1	3	3	0	2	3	1	0	0	1	1	3
1978	2017	1	1	0	2	2	3	0	2	2	0	1	0	1	0	3
1979	2017	1	1	2	1	3	3	0	2	2	0	1	0	0	1	3
1980	2017	0	0	0	2	2	2	0	2	2	0	1	0	1	0	3
1981	2017	0	1	1	2	3	3	0	2	2	0	2	0	1	0	2
1982	2017	0	0	2	4	1	2	0	2	5	1	2	0	1	1	1
1983	2017	0	1	1	2	2	3	0	2	3	0	1	0	1	0	2
1984	2017	0	1	0	2	3	2	0	2	1	0	1	0	0	0	3
1985	2017	0	0	0	3	2	2	0	2	2	0	0	0	1	0	2
1986	2017	0	0	1	4	1	2	0	2	4	0	1	0	1	0	2
1987	2017	0	1	1	2	2	3	0	2	2	0	1	0	1	0	3
1988	2017	1	1	1	1	1	3	0	2	4	1	1	0	1	0	2
1989	2017	0	1	1	2	2	3	0	2	3	1	2	0	1	1	2
1990	2017	1	0	1	2	3	2	0	2	3	0	2	0	0	0	3
1991	2017	0	0	0	2	2	3	0	2	3	0	1	0	0	0	2
1992	2017	0	1	1	1	1	3	0	2	4	1	1	0	0	0	2
1993	2017	0	0	0	2	1	2	0	2	2	0	2	0	1	0	3
1994	2017	0	0	0	2	3	2	0	2	3	0	1	0	1	0	3
1995	2017	0	1	0	2	1	2	0	2	3	0	1	1	0	0	3
1996	2017	0	1	0	2	3	1	0	2	2	0	1	0	1	0	3
1997	2017	0	1	2	2	3	3	0	2	3	1	1	0	0	0	1
1998	2017	1	1	2	1	1	3	0	2	2	0	0	0	0	0	2
1999	2017	0	1	2	2	2	2	0	2	2	0	2	0	0	0	1
[truncated: 24,892 more rows]

## Sheet: Variables
Identification	Identification
Year of the surveys	2006, 2009, 2011/2012, 2009, 2014
Antibiotic consumption	No 0 - Yes 1
Gender	Male 0 - Female 1
Age	65-74 years 0 - 75-84 years 1 - ≥ 85 years 2
Level of education	Without studies 1 - Primary 2 - Secondary or professional training 3 - University 4
Body Mass Index	Underweight 0 - Normal-weight 1 - Overweight 2 - Obesity 3
Marital status	Single 1 - Married 2 - Widowed 3 - Separated/divorced 4
Nationality	Spanish 0 - Foreigner 1
Size of town of residence	< 10,000 inhabitants 0 - 10,000 - 100,000 inhabitants 1 - > 100,000 inhabitants 2
Health status	Very good 1 - Good 2 - Fair 3 - Poor 4 - Very poor 5
Polipharmacy	No 0 - Yes 1
Chronic condition	None 0 - 1/2 chronic conditions 1 - ≥3 chronic conditions 2
Current smoking	No 0 - Yes 1
consumption of alcoholic beverages in the two weeks prior to the survey	No 0 - Yes 1
hospitalisation during the past twelve months	No 0 - Yes 1
degree of limitation due to a health problem for at least six months	Severely limited 1 - Limited but not severely 2 - Not at all limited 3
